# Supplementary material
Source: PubMed Central journal article supplement (PMC9218367)

## **Supplemental information**

### **VE607 stabilizes SARS-CoV-2 Spike in the “RBD-up” conformation and inhibits viral entry**

**Shilei Ding, Irfan Ullah, Shang Yu Gong, Jonathan R. Grover, Mohammadjavad Mohammadi, Yaozong Chen, Dani Vézina, Guillaume Beaudoin-Bussi eres, Vijay Tailor Verma, Guillaume Goyette, Fleur Gaudette, Jonathan Richard, Derek Yang, Amos B. Smith III, Marzena Pazgier, Marceline C ot e, Cameron Abrams, Priti Kumar, Walther Mothes, Pradeep D. Uchil, Andr es Finzi, and Christian Baron**

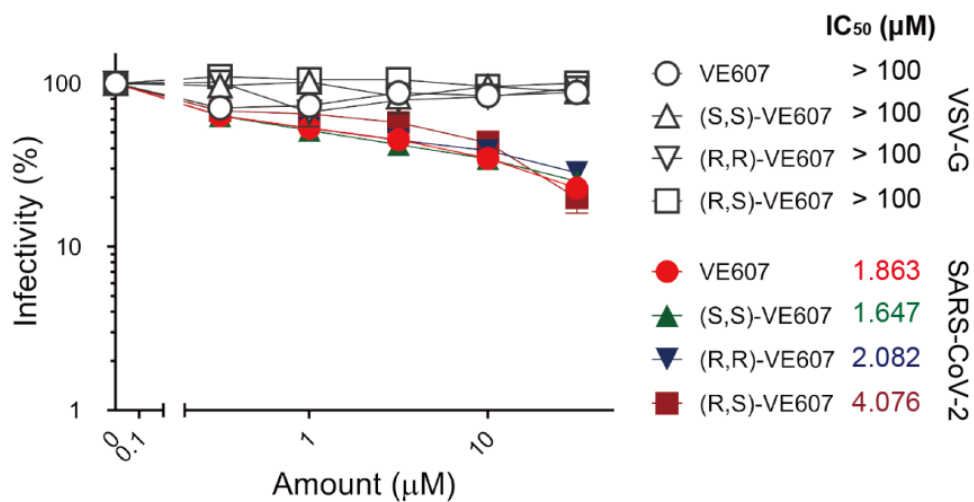

**Figure S1. Stereochemical isomers of VE607 have the same capacity as commercially available VE607 to neutralize SARS-CoV-2 pseudovirus particles. Related to Figure 1.** All three stereochemical isomers of VE607, (S,S)-VE607, (R,R)-VE607 and (R,S)-VE607 were tested for their inhibition of VSV-G pseudovirus or SARS-CoV-2 D614G pseudovirus. IC<sub>50</sub> values are shown next to the different isomers. Data represents the average of at least four independent experiments  $\pm$  SEM.

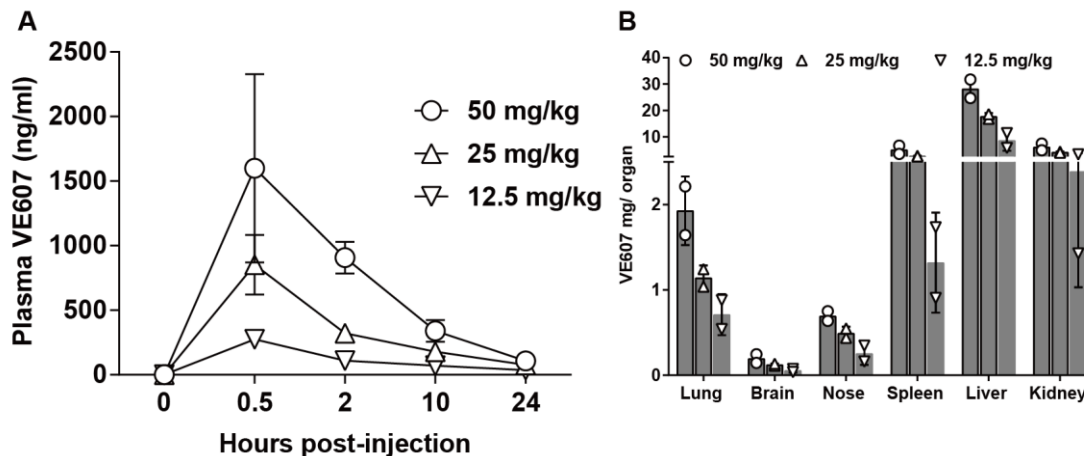

**Figure S2. Pharmacokinetics of VE607 in K18-hACE2 Mice. Related to Figure 5.**

(A) VE607 or vehicle (DMSO) was intraperitoneally injected into K18-hACE2 mice (n=2) at the indicated concentration. Serum samples were collected at 0.5 hour, 2 hour, 10 hour and 24 hour post injection. The VE607 serum concentrations (ng/ml) were determined by liquid chromatography-tandem mass spectrometry using mock-treated samples in parallel as baseline and VE607 in DMSO as standard (see Materials and Methods). (B) VE607 concentration (mg/indicated organ) at 24 hour post-injection.

**Data S1. Chemical synthesis of the three enantiomers of VE607. Related to figures 2 and 5.**

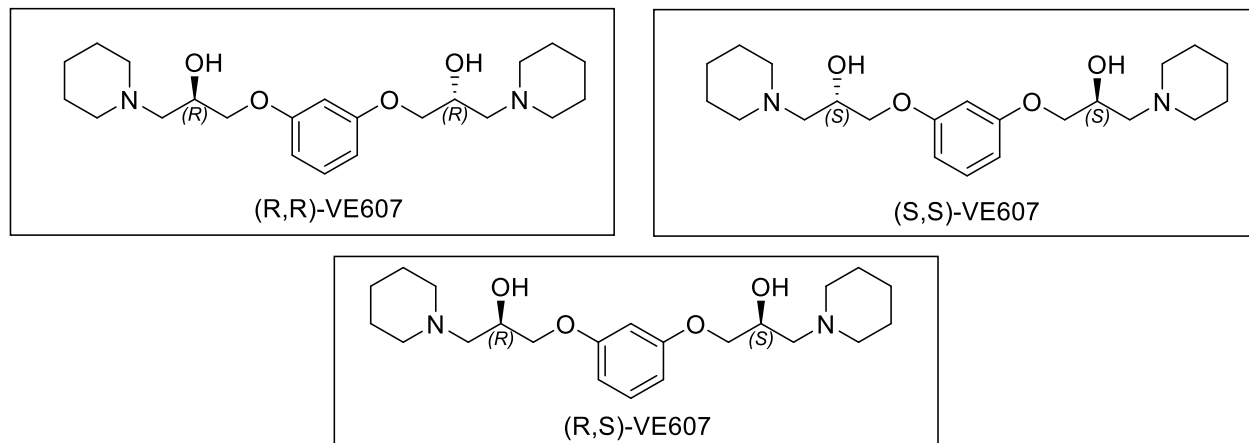

**General Procedures**

All reactions were conducted in oven-dried glassware under an inert atmosphere of nitrogen, unless otherwise stated. All solvents were reagent or high-performance liquid chromatography (HPLC) grade. Anhydrous THF was obtained from the Pure Solve™ PS-400 system under an argon atmosphere. All reagents were purchased from commercially available sources and used as received. Reactions were magnetically stirred under a nitrogen atmosphere, unless otherwise noted and were monitored by thin layer chromatography (TLC) was performed on pre-coated silica gel 60 F-254 plates (40-55 micron, 230-400 mesh) and visualized by UV light or staining with  $\text{KMnO}_4$  and heating. Yields refer to chromatographically and spectroscopically pure compounds. Optical rotations were measured on a JASCO P-200 polarimeter. Proton ( $^1\text{H}$ ) and carbon ( $^{13}\text{C}$ ) NMR spectra were recorded on a Bruker Avance III 500-MHz spectrometer. Chemical shifts ( $\delta$ ) are reported in parts per million (ppm) relative to chloroform ( $\delta$  7.26) or methanol ( $\delta$  3.31) for  $^1\text{H}$  NMR, and chloroform ( $\delta$  77.2) or methanol ( $\delta$  49.0). High resolution mass spectra (HRMS) were recorded at the University of Pennsylvania Mass Spectroscopy Service Center on either a VG Micromass 70/70H or VG ZAB-E spectrometer. Lyophilization was performed in a Labconco FreeZone 12 Plus lyophilizer (0.148 mbar). SFC analyses were performed with a JASCO system equipped with a PI-280- $\text{CO}_2$  plus  $\text{CO}_2$  Delivery System, a BP-2080 plus Automatic Back Pressure Regulator, an MD-2018 plus Photodiode Array Detector (200-648 nm), and PU-2080 plus Intelligent HPLC Pumps. The purity of new compounds were judged by NMR and LCMS (>95%).

**Experimental Procedures**

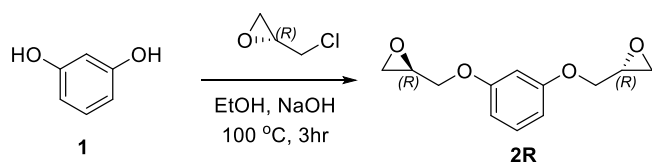

**1,3-bis(((R)-oxiran-2-yl)methoxy)benzene (+)-2R<sup>1</sup>**: Resorcinol (**1**) (100 mg, 0.908 mmol, 1 equiv) was dissolved in enantiopure (*R*)-epichlorohydrin (0.569 mL, 7.27 mmol, 8.0 equiv) and heated to 100 °C. A solution of NaOH (72.7 mg, 1.82 mmol, 2.0 equiv) in EtOH (0.75 mL) was then added dropwise. After stirring at 100 °C for three hours, the solution was cooled to r.t., diluted with acetone and filtered through a fritted funnel packed with celite. The filtrate was then concentrated *in vacuo* which was purified via flash column chromatography (5% to 10% EtOAc/hexanes) to yield the title compound as a yellow oil in 97% yield. <sup>1</sup>H NMR (500 MHz, CDCl<sub>3</sub>): δ 7.17 (t, J= 8.08 Hz, 1H), 6.55-6.51 (m, 3H), 4.20 (dd, J= 7.84, 3.17 Hz, 2H), 3.95 (dd, J= 5.66, 5.29 Hz, 2H), 3.36 – 3.33 (m, 2H), 2.90 (t, J= 4.77 Hz, 2H). 2.75 (dd, J= 2.63, 2.35 Hz, 2H); <sup>13</sup>C NMR (125 MHz, CDCl<sub>3</sub>): δ 159.76, 130.06, 107.44, 101.94, 68.83, 50.13, 44.87; HRMS (ESI) *m/z*: [M+Na]<sup>+</sup> calcd 245.0790, found 245.0791; [α]<sub>D</sub><sup>23</sup> +17.28 (c 0.74, MeOH).

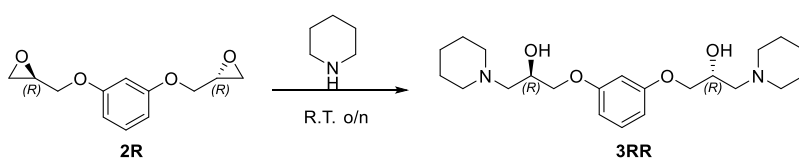

**(2R,2'R)-3,3'-(1,3-phenylenebis(oxy))bis(1-(piperidin-1-yl)propan-2-ol) (+)-3RR**: Epoxide **2R** (25 mg, 0.113 mmol, 1.0 equiv) was

dissolved in neat piperidine (0.177 mL, 1.8 mmol, 16 equiv) at 0 °C and stirred overnight at room temperature. Upon completion, solvent was removed *in vacuo*, dissolved in DCM, washed with brine, dried with Na<sub>2</sub>SO<sub>4</sub>, filtered through a cotton plug, and concentrated *in vacuo*. The crude product mixture was then dissolved in water, frozen, and lyophilized to remove excess piperidine. Product was isolated as a yellow oil in 99% yield. <sup>1</sup>H NMR (500 MHz, CD<sub>3</sub>OD): δ 7.17-7.13 (m, 1H), 6.55-6.52 (m, 3H), 4.15-4.10 (m, 2H), 3.96 (dd, J= 5.59, 4.31 Hz, 2H), 3.89 (dd, J= 5.93, 3.82, 2H), 2.57-2.46 (m, 12H), 1.64-1.59(m, 8H), 1.51-1.44(m, 4H); <sup>13</sup>C NMR (125 MHz, CD<sub>3</sub>OD): δ 161.62, 130.96, 108.15, 102.78, 72.15, 68.36, 63.18, 56.28, 47.47, 27.07, 26.77, 25.55, 25.23; HRMS (ESI) *m/z*: [M+H]<sup>+</sup> calcd 393.2753, found 393.276; [α]<sub>D</sub><sup>23</sup> +3.2 (c 0.33, MeOH).

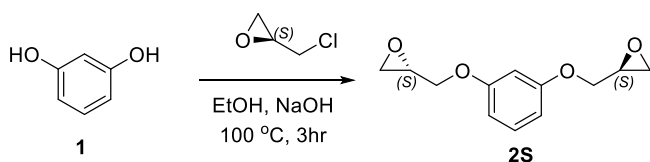

**1,3-bis(((S)-oxiran-2-yl)methoxy)benzene (-)-2S<sup>2</sup>**: Resorcinol (**1**) (100 mg, 0.908 mmol, 1 equiv) was dissolved in enantiopure (*S*)-epichlorohydrin (0.569 mL, 7.27 mmol, 8.0 equiv) and heated to 100 °C. A solution of

NaOH (72.7 mg, 1.82 mmol, 2.0 equiv) in EtOH (0.75 mL) was then added dropwise. After stirring at 100 °C for three hours, the solution was cooled to r.t., diluted with acetone and filtered through a fritted funnel packed with celite. The filtrate was then concentrated *in vacuo* which was purified via flash column chromatography (5% to 10% EtOAc/hexanes) to yield the title compound as a yellow oil in 97% yield. <sup>1</sup>H NMR (500 MHz, CDCl<sub>3</sub>): δ 7.17 (t, 7.70 Hz, 1H), 6.55-6.51 (m, 3H), 4.20 (dd, J= 7.76, 3.13 Hz, 2H), 3.93 (dd, J= 5.77, 5.34 Hz, 2H), 3.36-3.33 (m, 2H), 2.90 (t, J=

<sup>1</sup> Nouailhas, H., Aouf, C., Le Guernevé, C., Caillol, S., Boutevin, B., & Fulcrand, H. (2011). Synthesis and properties of biobased epoxy resins. Part 1. Glycidylation of flavonoids by epichlorohydrin. *Journal of Polymer Science Part A: Polymer Chemistry*, 49(10), 2261-2270.

<sup>2</sup> Nouailhas, H., Aouf, C., Le Guernevé, C., Caillol, S., Boutevin, B., & Fulcrand, H. (2011). Synthesis and properties of biobased epoxy resins. Part 1. Glycidylation of flavonoids by epichlorohydrin. *Journal of Polymer Science Part A: Polymer Chemistry*, 49(10), 2261-2270.

4.87, 2H), 2.75 (dd, 2.68, 2.29, 2H);  $^{13}\text{C}$  NMR (500 MHz,  $\text{CDCl}_3$ ):  $\delta$  159.74, 130.04, 107.42, 101.92, 68.81, 50.11, 44.74; HRMS (ESI)  $m/z$ :  $[\text{M}+\text{Na}]^+$  calcd 245.0805, found 245.0805;  $[\alpha]_{\text{D}}^{23}$  -17.09 (c 0.74, MeOH).

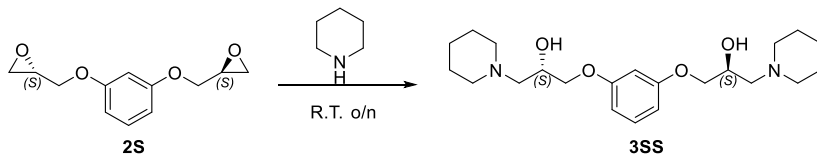

**(2S,2'S)-3,3'-(1,3-phenylenebis(oxy))bis(1-(piperidin-1-yl)propan-2-ol) (-)-3SS**: Epoxide **2** (25 mg, 0.113 mmol, 1.0 equiv) was dissolved

in neat piperidine (0.177 mL, 1.8 mmol, 16 equiv) at 0 °C and stirred overnight at room temperature. Upon completion, solvent was removed *in vacuo*, dissolved in DCM, washed with brine, dried with  $\text{Na}_2\text{SO}_4$ , filtered through a cotton plug, and concentrated *in vacuo*. The crude product mixture was then dissolved in water, frozen, and lyophilized to remove excess piperidine. Product was isolated as a yellow oil in 99% yield.  $^1\text{H}$  NMR (500 MHz,  $\text{CD}_3\text{OD}$ ):  $\delta$  7.18-7.14 (m, 1H), 6.56-6.52 (m, 3H), 4.18-4.14 (m, 2H), 3.96 (dd,  $J$  = 4.51, 4.45 Hz, 2H), 3.89 (dd,  $J$  = 5.79, 5.73 Hz), 2.73-2.62 (m, 12H), 1.66-1.57 (m, 8H), 1.56-1.48 (m, 4H);  $^{13}\text{C}$  NMR (125 MHz,  $\text{CD}_3\text{OD}$ ):  $\delta$  121.91, 130.96, 108.14, 102.78, 72.15, 68.33, 63.18, 56.27, 47.59, 27.33, 26.78, 25.74, 25.23; HRMS (ESI)  $m/z$ :  $[\text{M}+\text{Na}]^+$  calcd 415.2567, found 415.2567;  $[\alpha]_{\text{D}}^{23}$  -2.96 (c 0.33, MeOH).

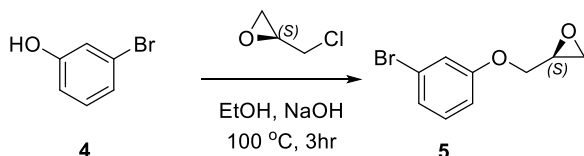

**(S)-2-((3-bromophenoxy)methyl)oxirane (+)-5**: 3-bromophenol (200 mg, 1.15 mmol, 1.0 equiv) was dissolved in (S)-epichlorohydrin (0.363 mL, 4.624 mmol, 4.0 equiv) and heated to 100 °C. A solution of NaOH (46 mg, 1.15 mmol, 1.0 equiv)

was dissolved in EtOH (0.375 mL) and added dropwise. After stirring at 100 °C for three hours, the solution was cooled to r.t., diluted with acetone and filtered through a fritted funnel packed with celite. The filtrate was then concentrated *in vacuo* which was purified via flash column chromatography (5% to 10% EtOAc/hexanes) to yield the title compound as a yellow oil in 95% yield.  $^1\text{H}$  NMR (500 MHz,  $\text{CDCl}_3$ ):  $\delta$  7.17-7.07 (m, 3H), 6.86 (dq,  $J$  = 8.13, 1.35, 0.97 Hz, 1H), 4.22 (dd, 11.03, 3.03 Hz, 1H), 3.93 (dd,  $J$  = 5.70, 5.32 Hz, 1H), 3.37-3.32 (m, 1H), 2.91 (t,  $J$  = 4.47 Hz, 1H), 2.75 (dd,  $J$  = 2.63, 2.26 Hz, 1H);  $^{13}\text{C}$  NMR (125 MHz,  $\text{CDCl}_3$ ):  $\delta$  159.27, 130.65, 124.41, 122.86, 118.02, 113.70, 69.03, 49.98, 44.64; HRMS (EI)  $m/z$ :  $[\text{M}+\text{H}]^+$  calcd 227.9786, found 227.9793;  $[\alpha]_{\text{D}}^{23}$  -6.718 (1.08 c, MeOH).

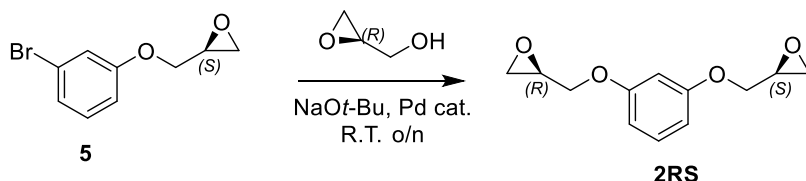

**1-(((R)-oxiran-2-yl)methoxy)-3-(((S)-oxiran-2-yl)methoxy)benzene (2RS)<sup>3</sup>**: Sodium *tert*-butoxide (23.4 mg, 0.2385 mmol, 1.5 equiv) was added to a oven dried flask,

sealed with a rubber septa, purged 3x with nitrogen. THF (0.160 mL) was then added to this flask

<sup>3</sup> Zhang, H., Ruiz-Castillo, P., & Buchwald, S. L. (2018). Palladium-catalyzed C–O cross-coupling of primary alcohols. *Organic letters*, 20(6), 1580-1583.

and sonicated to homogenize the solution. In a separate oven dried 5 mL round tapered flask, *t*-BuBrettPhos Palladacycle Gen. 3 (2.71 mg, 0.00318 mmol, 0.02 equiv), epoxide **(5)** (36.5 mg, 0.159 mmol, 1.0 equiv), and (R)-glycidol (21.27 mg, 0.318 mmol, 2.0 equiv) were added. This flask was sealed with a rubber septa and purged 3x with nitrogen. The sodium *tert*-butoxide in THF solution as then added dropwise to the second flask at room temperature under positive N<sub>2</sub> pressure, and allowed to stir overnight at r.t. Upon completion, the mixture was diluted with EtOAc, and filtered through a fritted funnel packed with celite. The filtrate was then concentrated *in vacuo* which was purified via flash column chromatography (5% to 10% EtOAc/hexanes) as a yellow oil in 35% yield. **<sup>1</sup>H NMR** (500 MHz, CDCl<sub>3</sub>): δ 7.20 (t, J= 8.10, 1Hz), 6.58 - 6.53 (m, 2H), 4.22 (dd, J= 7.85, 3.16 Hz, 2H), 3.96 (dd, J= 5.71, 5.32 Hz, 2H), 3.39 - 3.35 (m, 2H), 2.93 (t, J= 4.50 Hz, 2H), 2.77 (dd, J= 2.64, 2.26 Hz, 2H); **<sup>13</sup>C NMR** (125 MHz, CDCl<sub>3</sub>): δ 159.76, 130.06, 107.44, 101.95, 68.85, 50.13, 44.78; **HRMS** (ESI) *m/z*: [M+H]<sup>+</sup> calcd 223.0970, found 223.0969; [α]<sub>D</sub><sup>23</sup> +0.15 (0.936 c, MeOH).

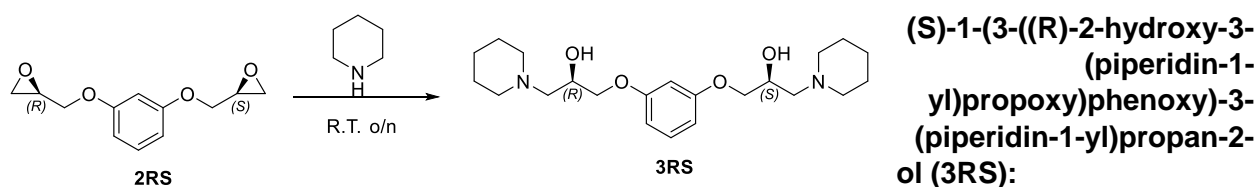

Epoxide **2** (25 mg, 0.113 mmol, 1.0 equiv) was dissolved in neat piperidine (0.177 mL, 1.8 mmol, 16 equiv) at 0 °C and stirred overnight at room temperature. Upon completion, solvent was removed *in vacuo*, dissolved in DCM, washed with brine, dried with Na<sub>2</sub>SO<sub>4</sub>, filtered through a cotton plug, and concentrated *in vacuo*. The crude product mixture was then dissolved in water, frozen, and lyophilized to remove excess piperidine. Product was isolated as a yellow oil in 90% yield. **<sup>1</sup>H NMR** (500 MHz, CD<sub>3</sub>OD): δ 7.17 (t, J= 7.57 Hz, 1H), 6.58-6.53 (m, 3H), 4.23-4.17 (m, 2H), 3.99-3.90 (m, 2H), 2.89-2.70 (m, 12H), 1.78-1.65 (m, 8H), 1.60-1.50 (m, 4H); **<sup>13</sup>C NMR** (125 MHz, CD<sub>3</sub>OD): δ 161.61, 130.96, 108.15, 102.78, 72.14, 68.31, 63.16, 56.26, 26.74, 25.20; **HRMS** (ESI) *m/z*: [M+H]<sup>+</sup> calcd 393.2753, found 393.2761; [α]<sub>D</sub><sup>23</sup> +0.19 (0.565 c, MeOH).

### SFC Analysis of commercially available VE607 (see below)

The ratio of the three stereoisomers in the commercial sample of VE607 was determined by SFC to be roughly 1:1:2 of (S,S)-VE607: (R,R)-VE607: (R,S)-VE607. SFC separation was achieved via a Chiralpak® IA-3 column. The elutant gradient was 1% MeOH in supercritical CO<sub>2</sub> to 5% MeOH in supercritical CO<sub>2</sub> over 10 minutes. Flow rate was 2.5 mL/min at 6 MPa. Retention times: (S,S)-VE607: 4.6 min, (R,R)-VE607: 4.8 min, (R,S)-VE607: 5.3 min.

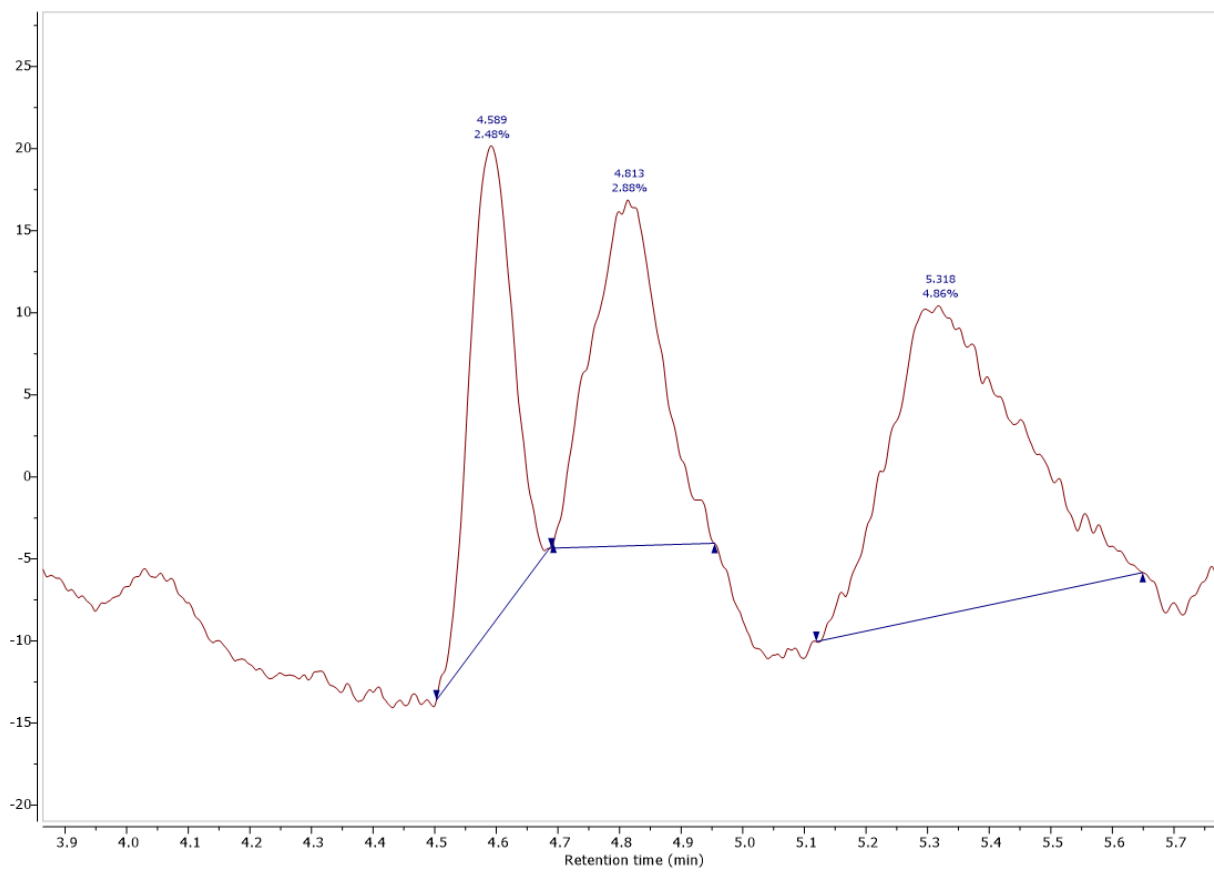

## Spectral Data

<sup>1</sup>H NMR for 1,3-bis(((R)-oxiran-2-yl)methoxy)benzene (+)-2R



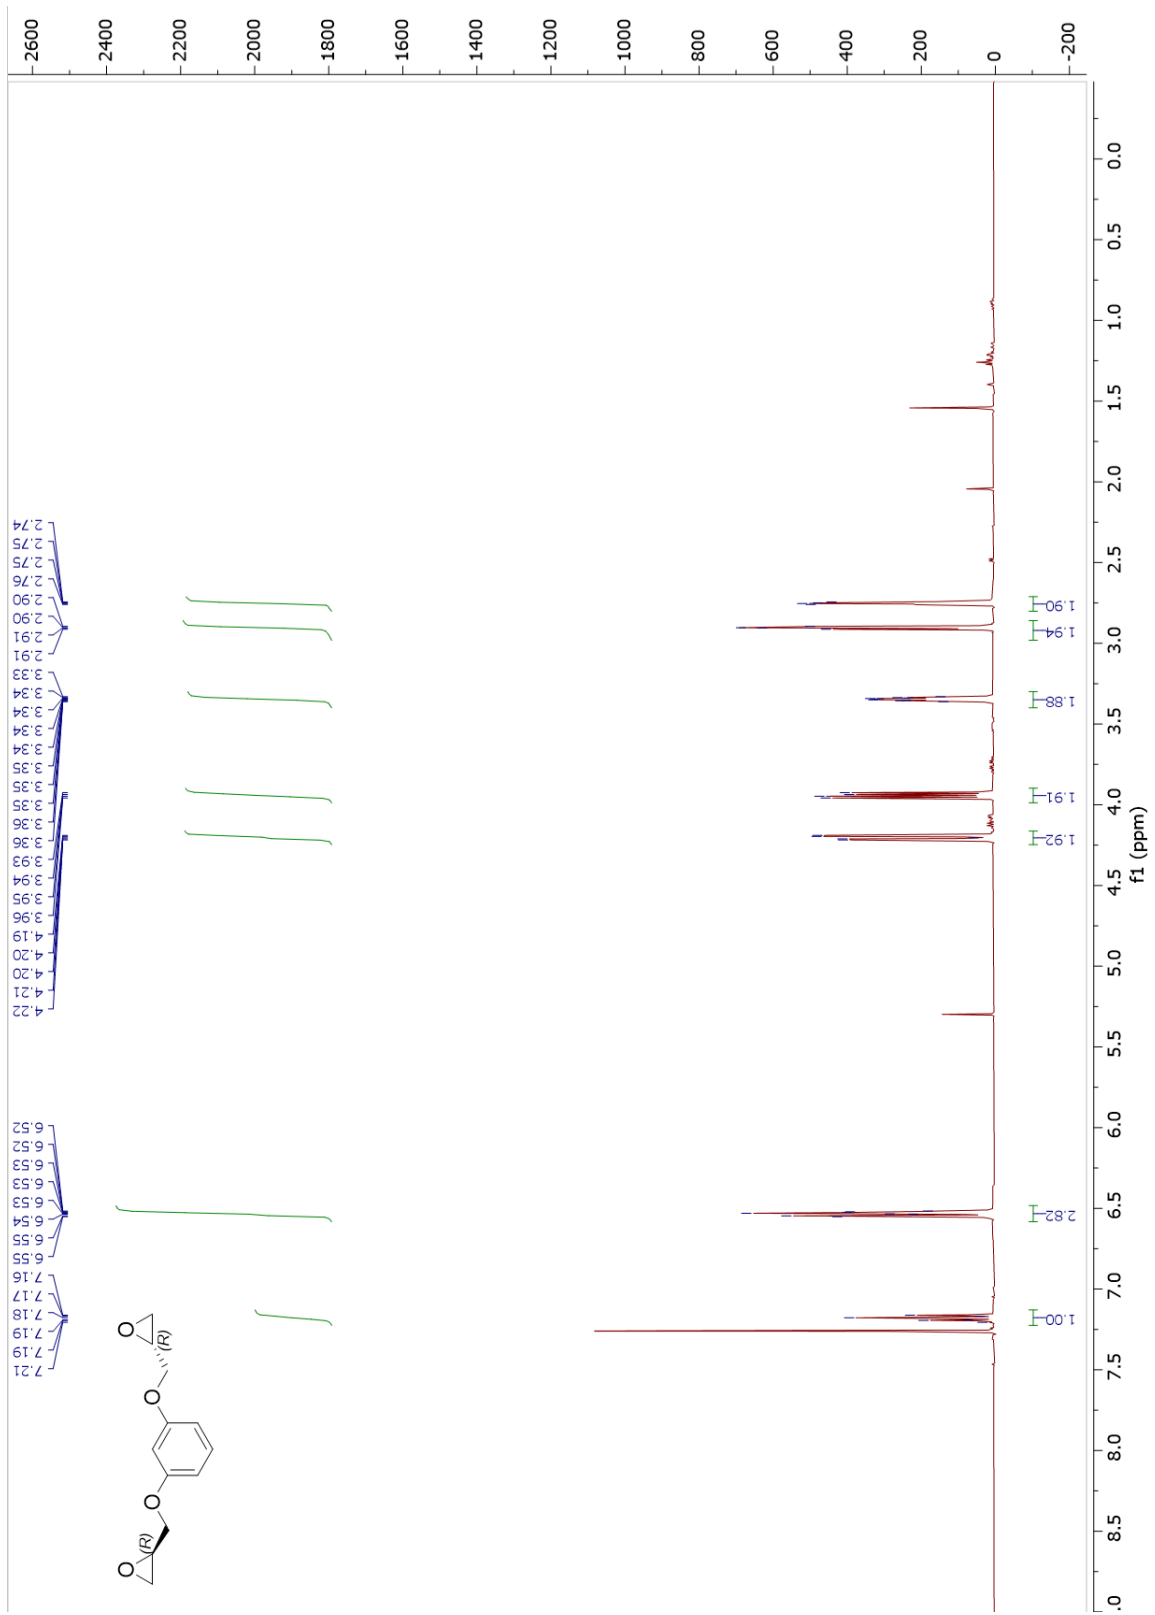

<sup>13</sup>C NMR for 1,3-bis(((R)-oxiran-2-yl)methoxy)benzene (+)-2R

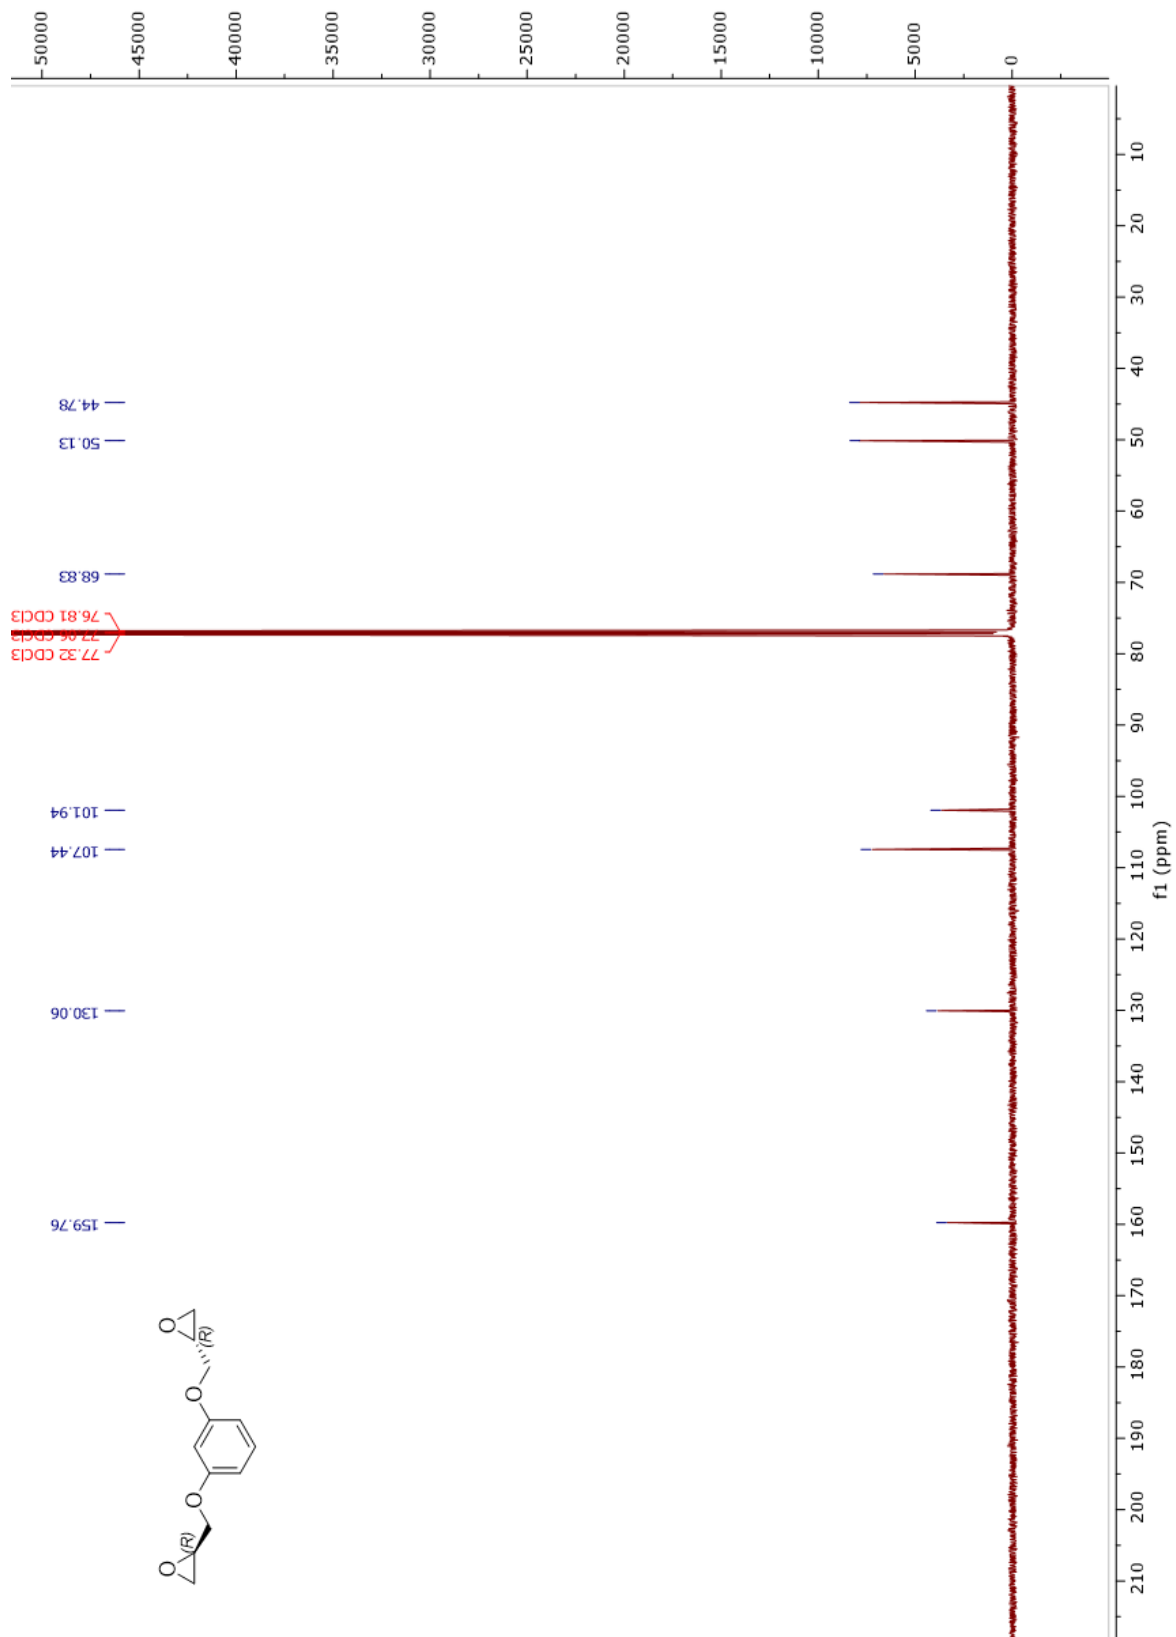

<sup>1</sup>H NMR for (2R,2'R)-3,3'-(1,3-phenylenebis(oxy))bis(1-(piperidin-1-yl)propan-2-ol) (+)-3RR

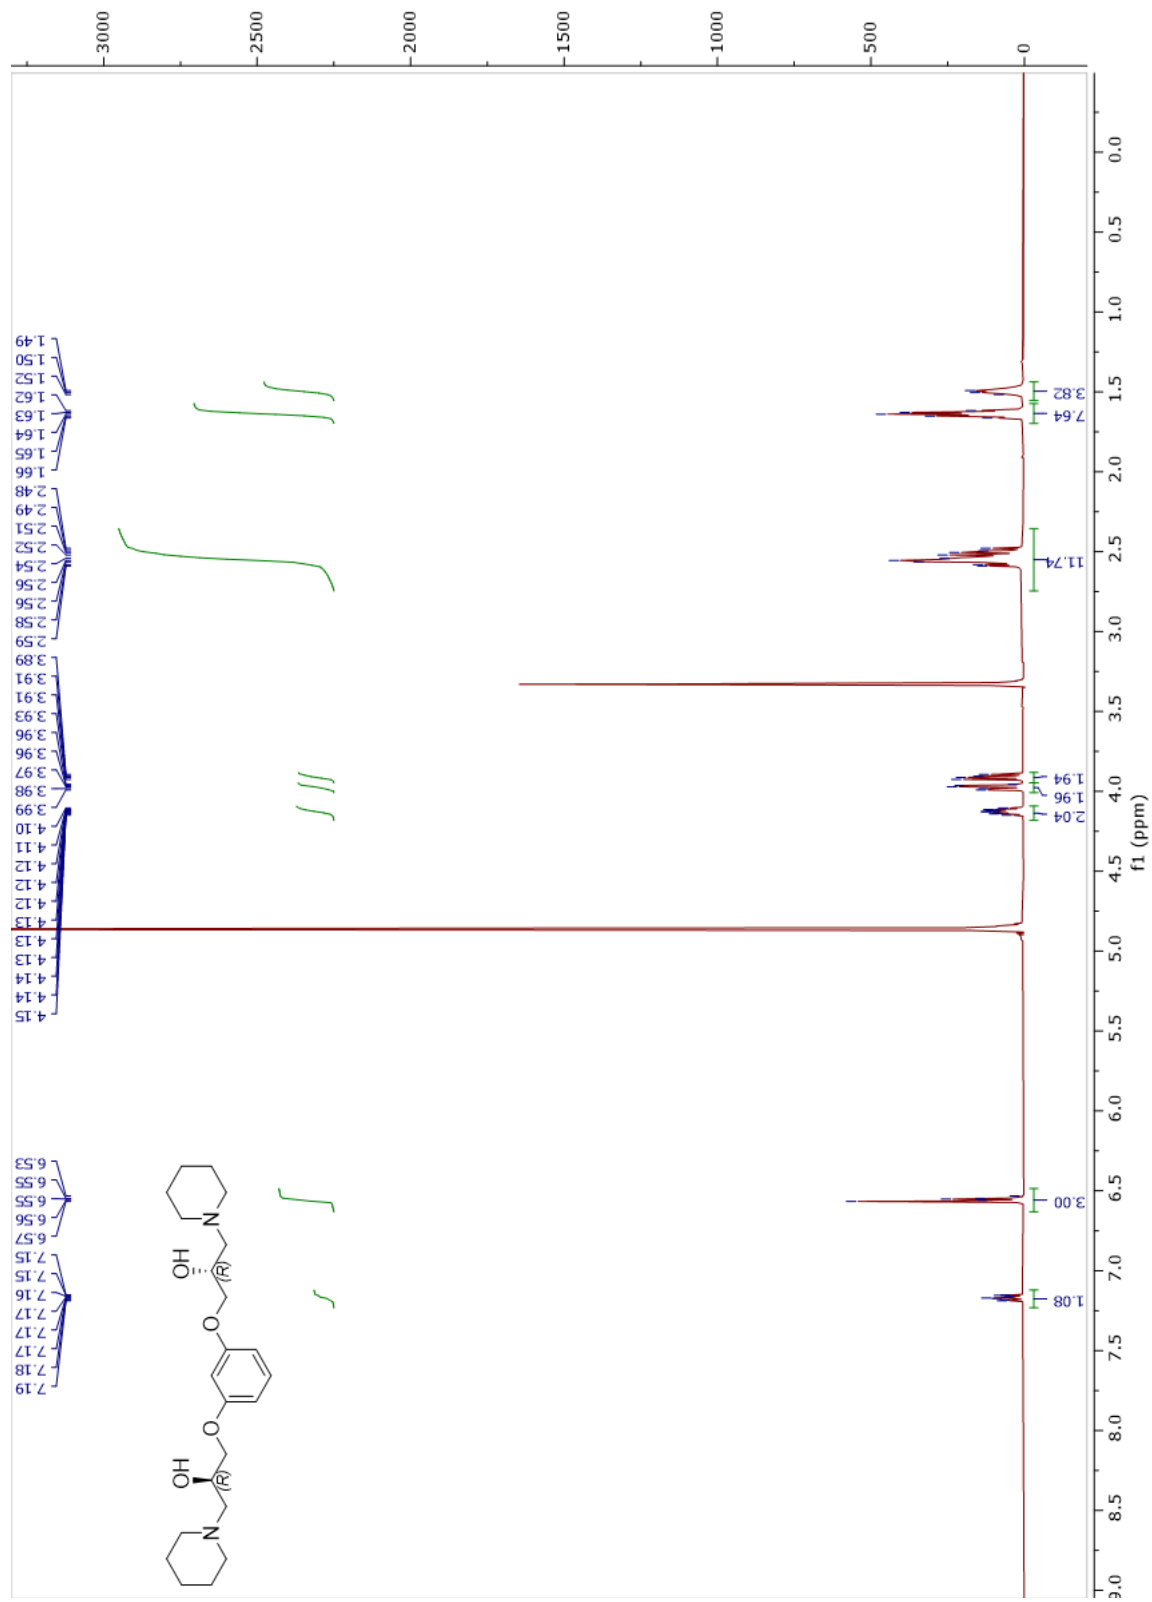

**<sup>13</sup>C NMR for (2R,2'R)-3,3'-(1,3-phenylenebis(oxy))bis(1-(piperidin-1-yl)propan-2-ol) (+)-3RR**

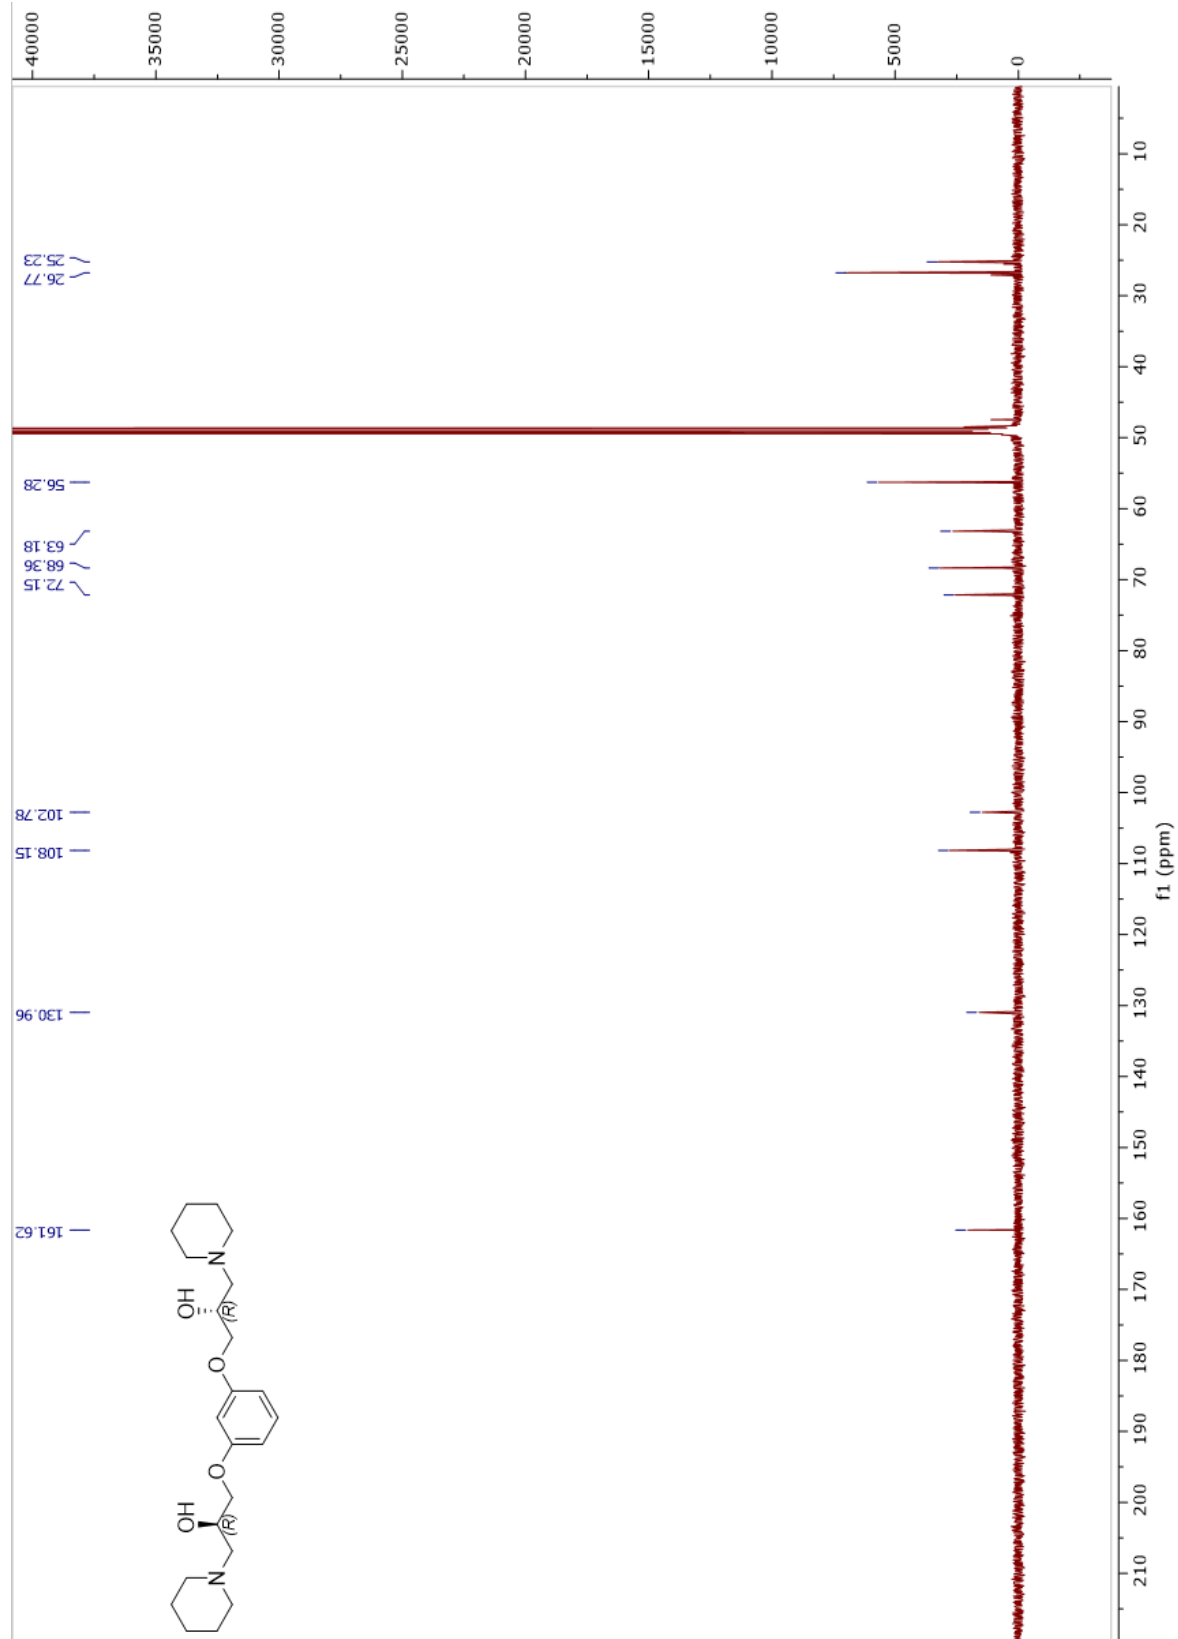

1H NMR for 1,3-bis(((S)-oxiran-2-yl)methoxy)benzene (-)-2S

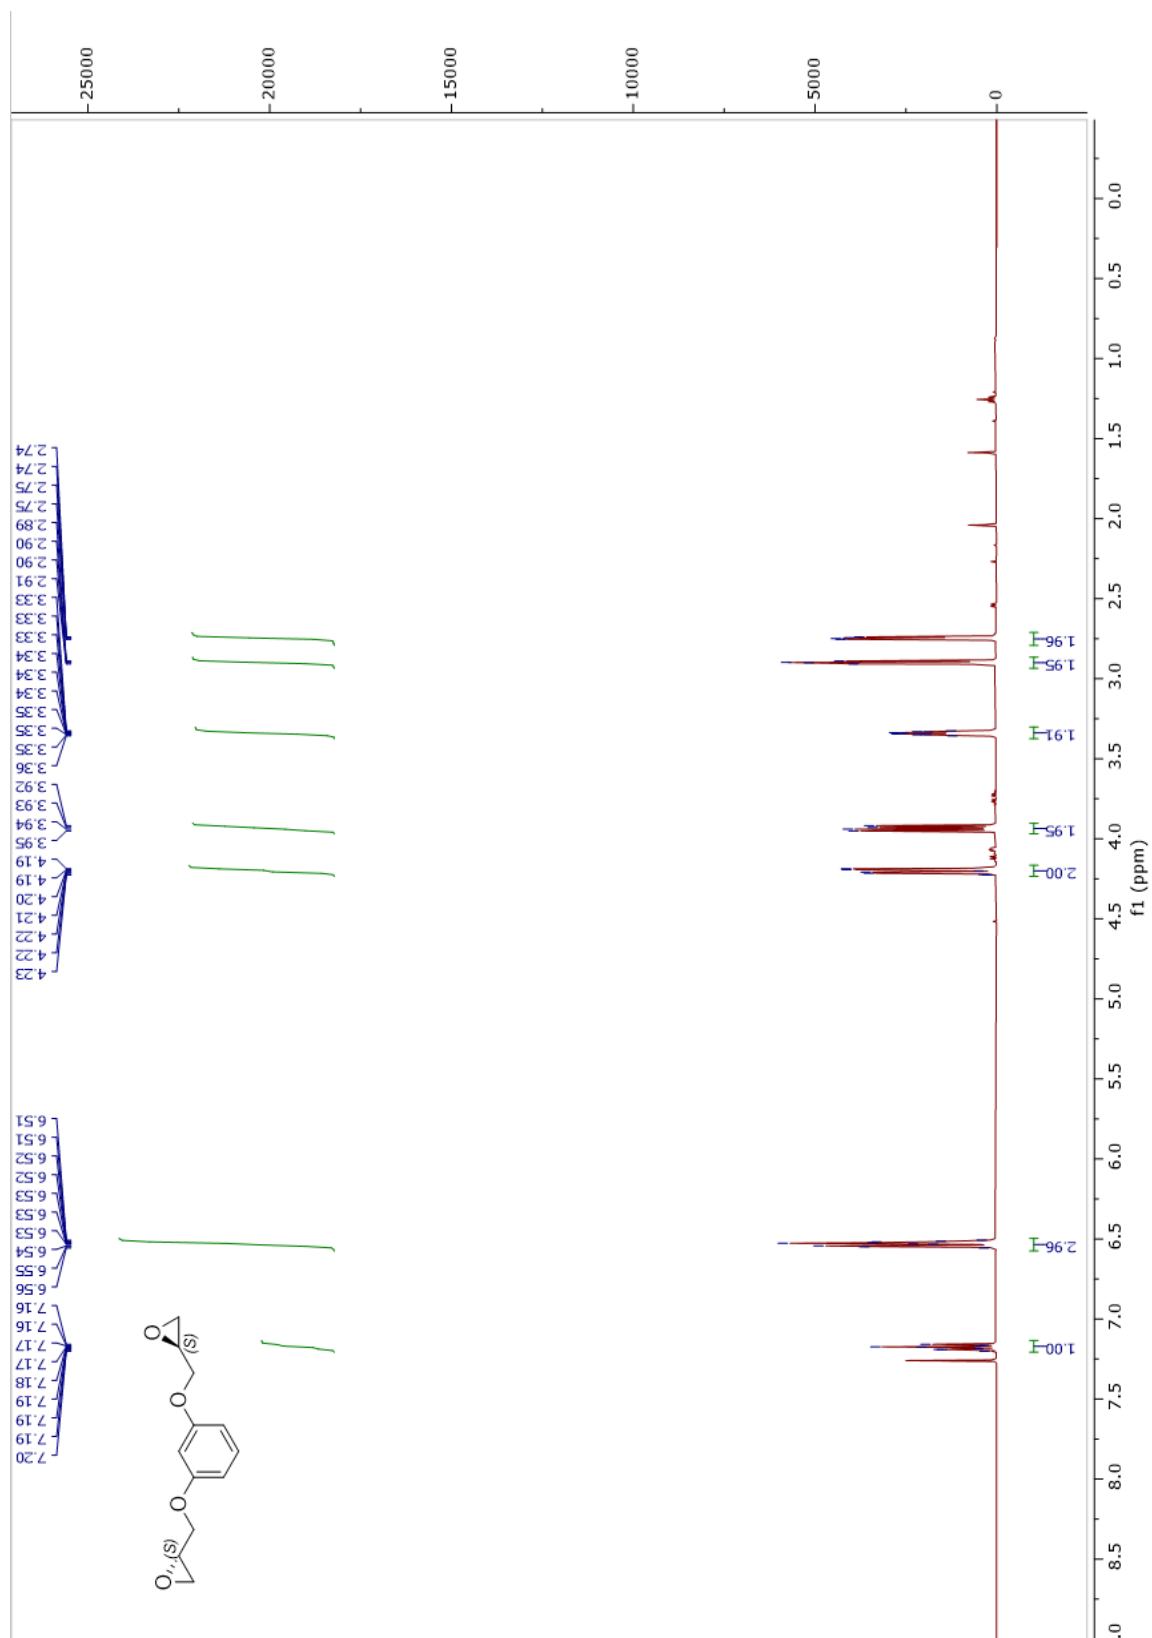

<sup>13</sup>C NMR for 1,3-bis(((S)-oxiran-2-yl)methoxy)benzene (-)-2S

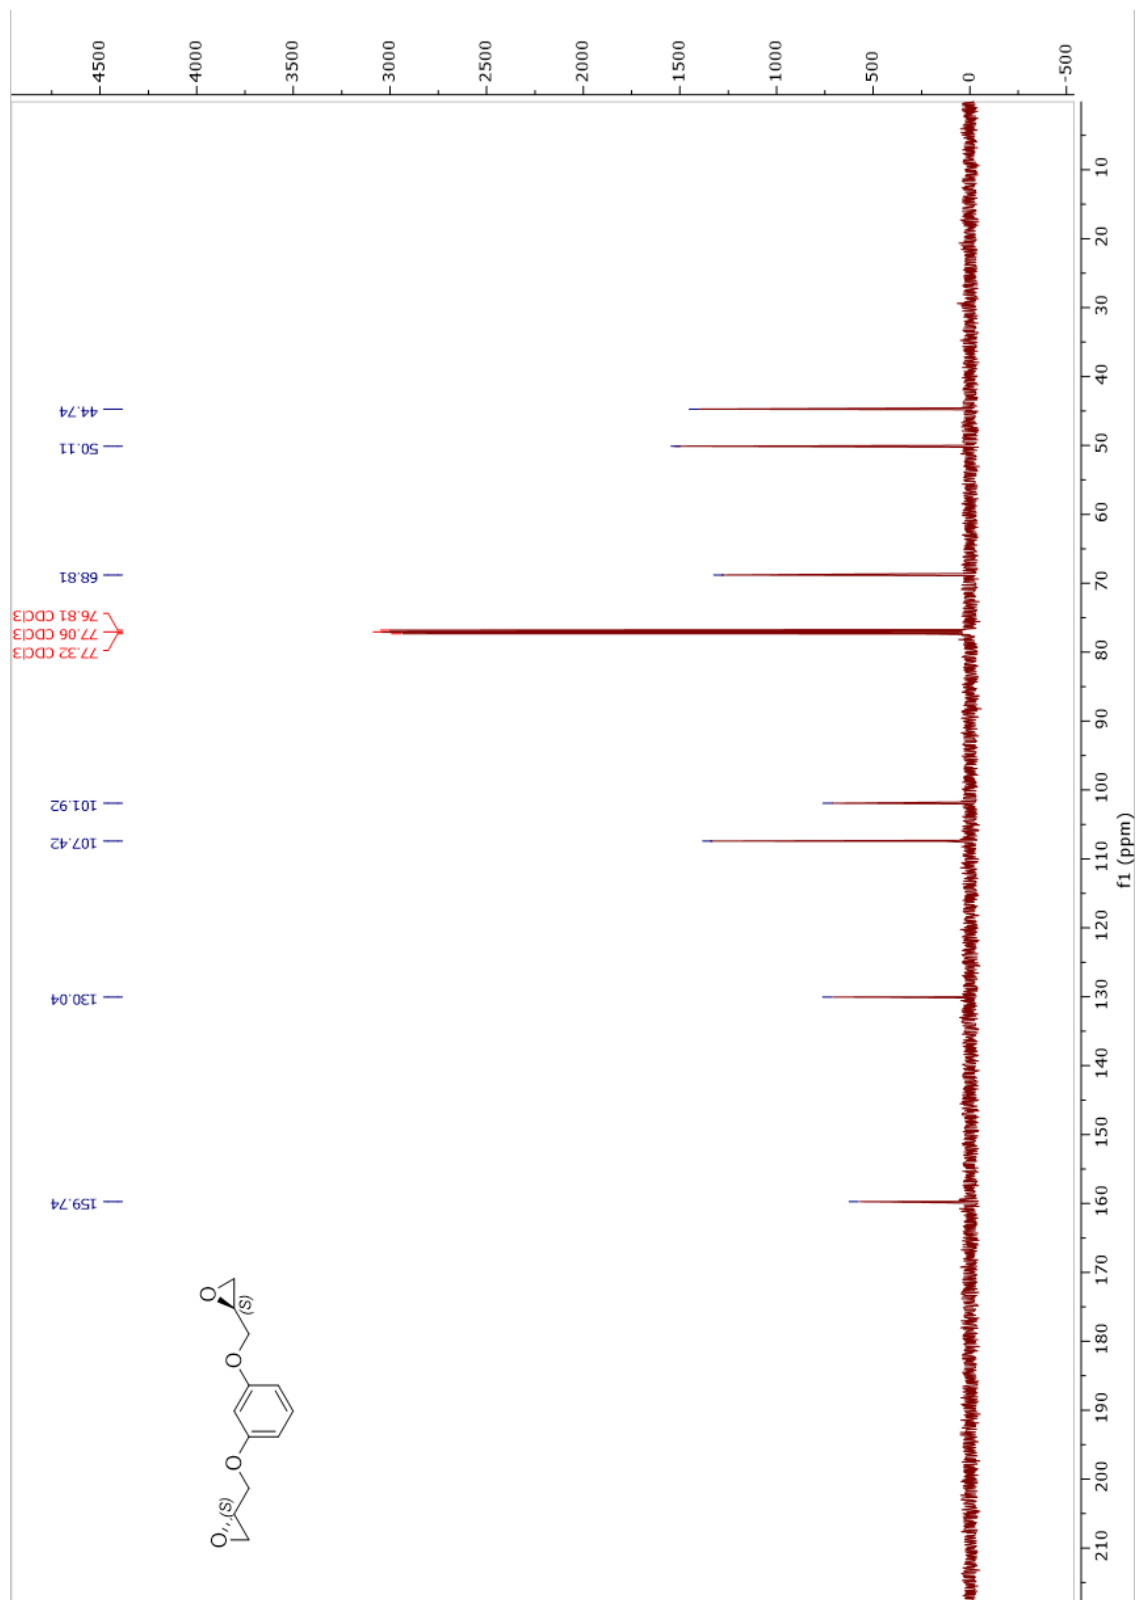

<sup>1</sup>H NMR for (2S,2'S)-3,3'-(1,3-phenylenebis(oxy))bis(1-(piperidin-1-yl)propan-2-ol) (-)-3SS

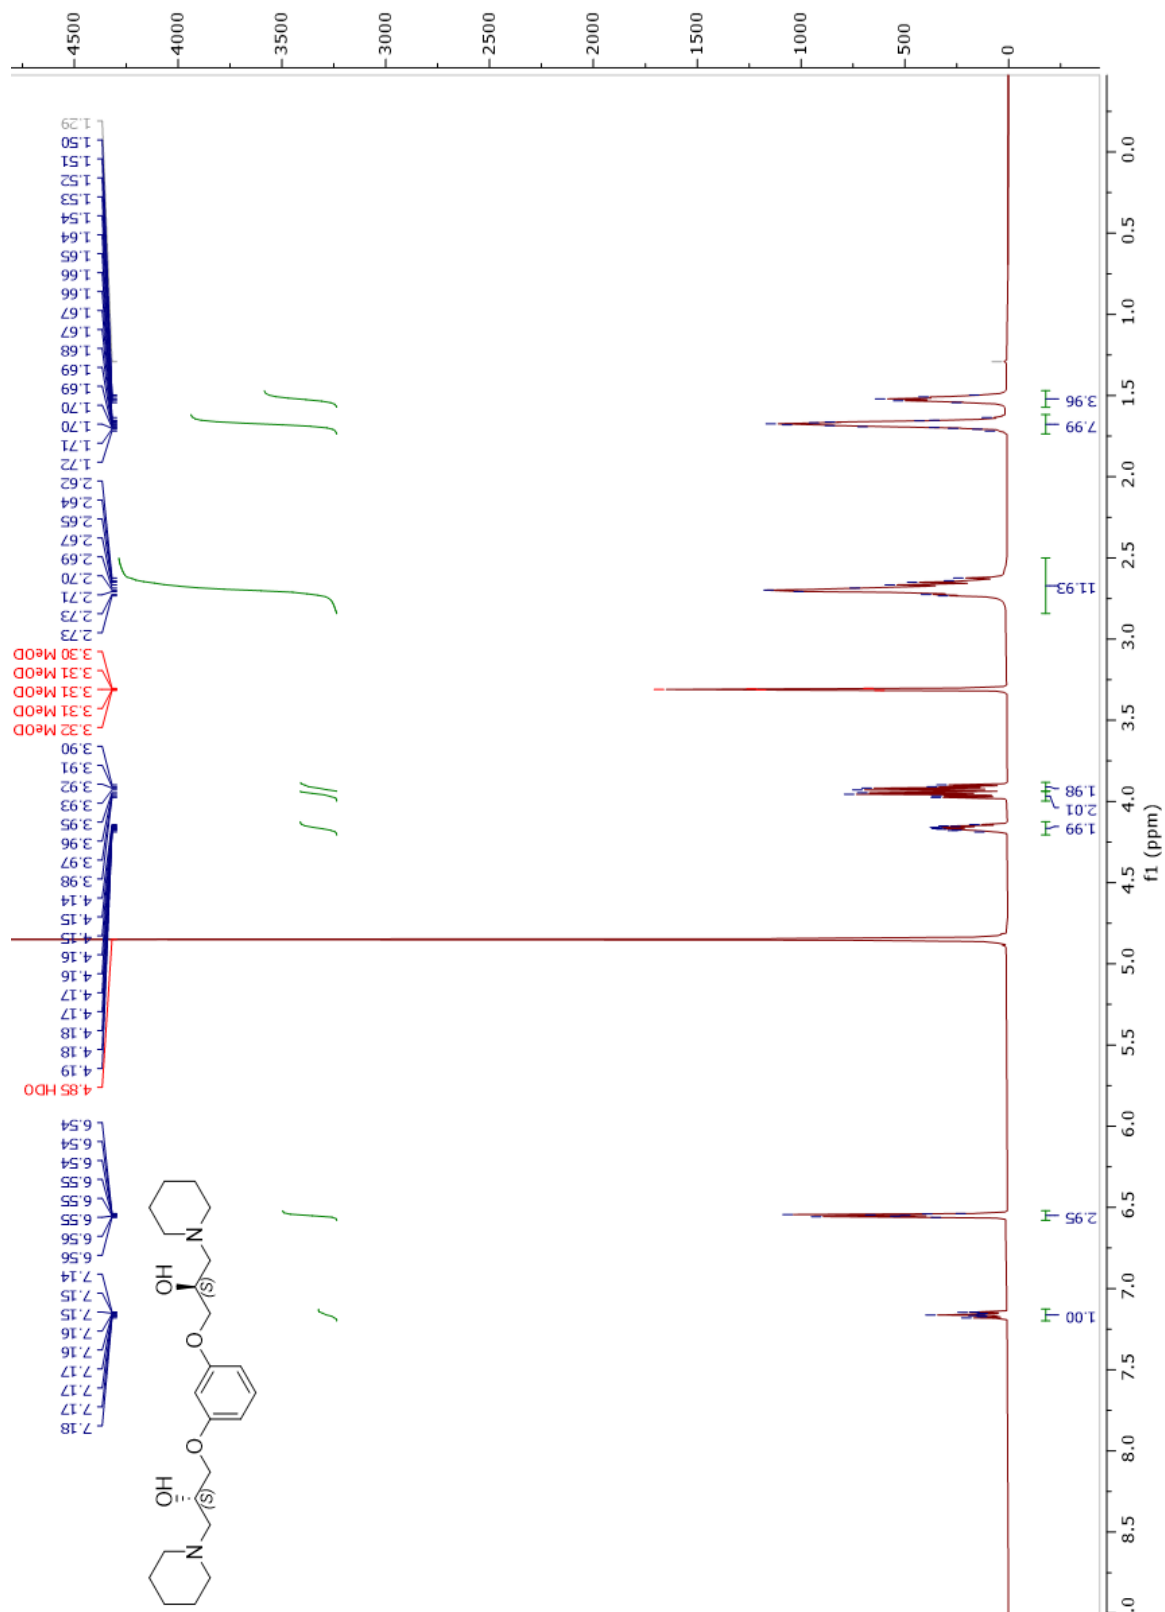

**<sup>13</sup>C NMR for (2S,2'S)-3,3'-(1,3-phenylenebis(oxy))bis(1-(piperidin-1-yl)propan-2-ol) (-)-3SS**

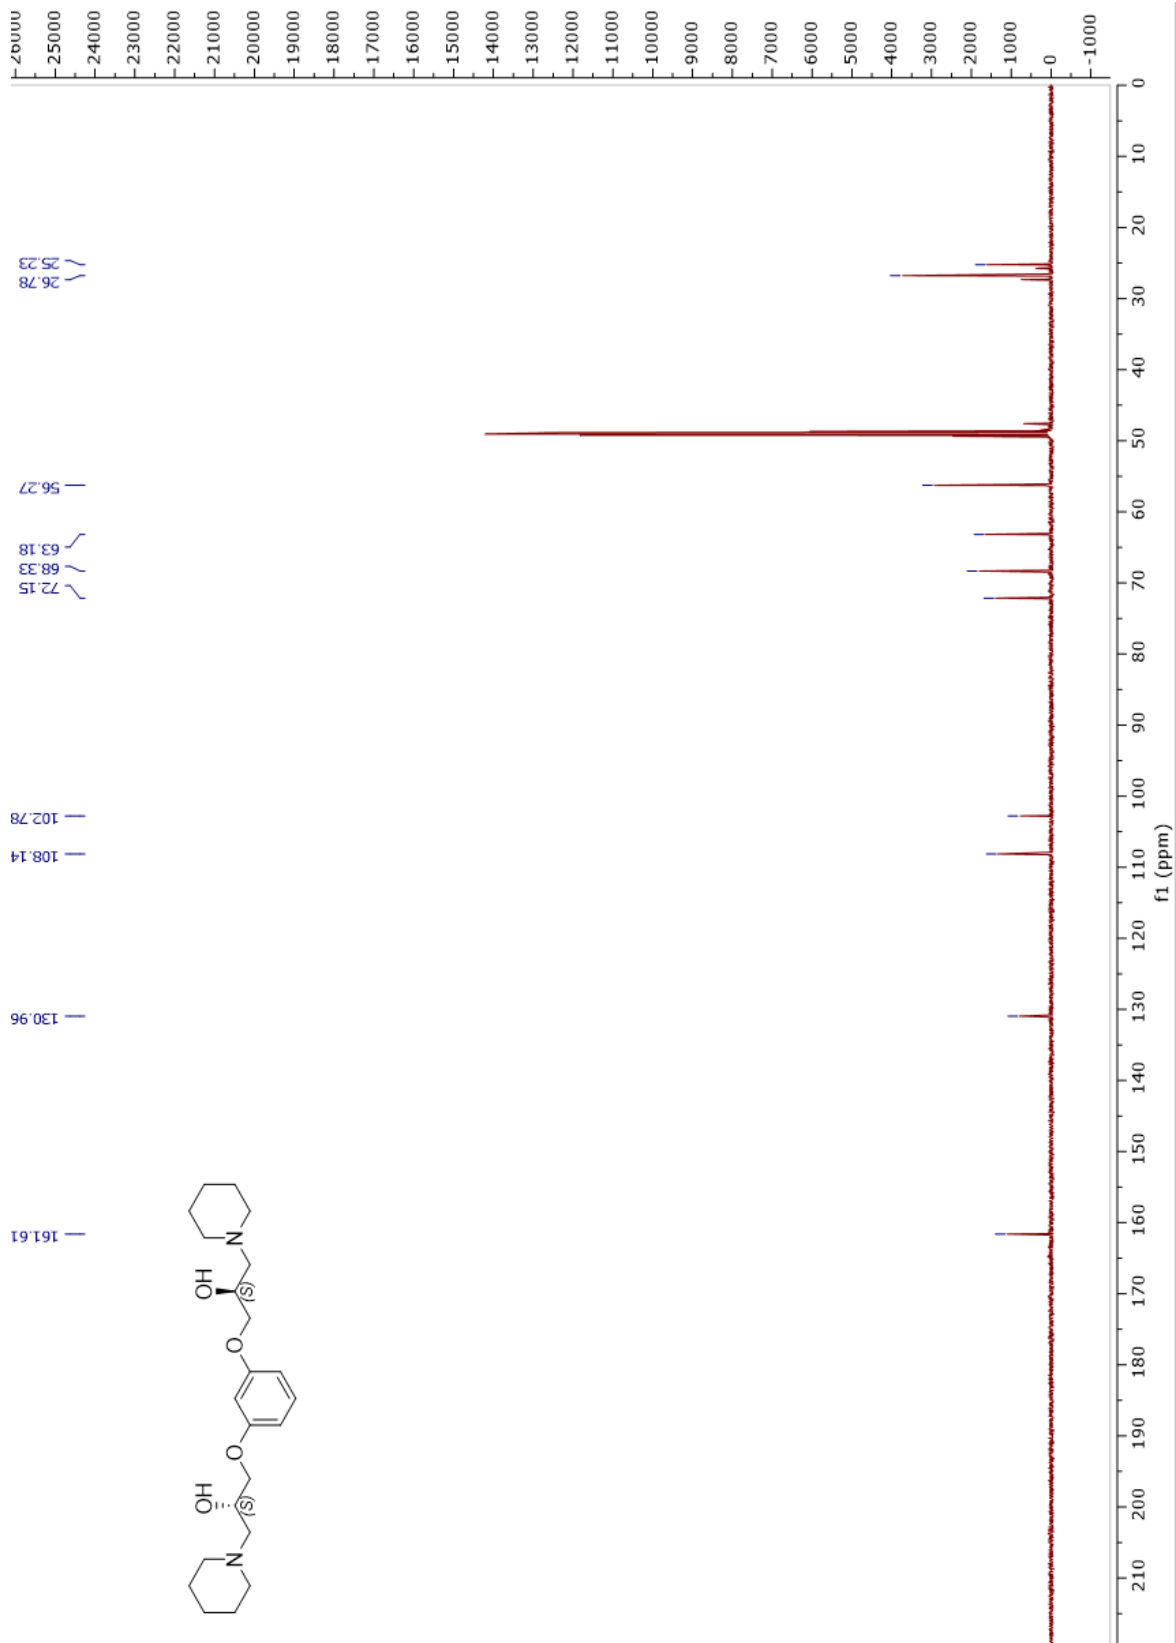

**<sup>1</sup>H NMR for (S)-2-((3-bromophenoxy)methyl)oxirane (+)-5**



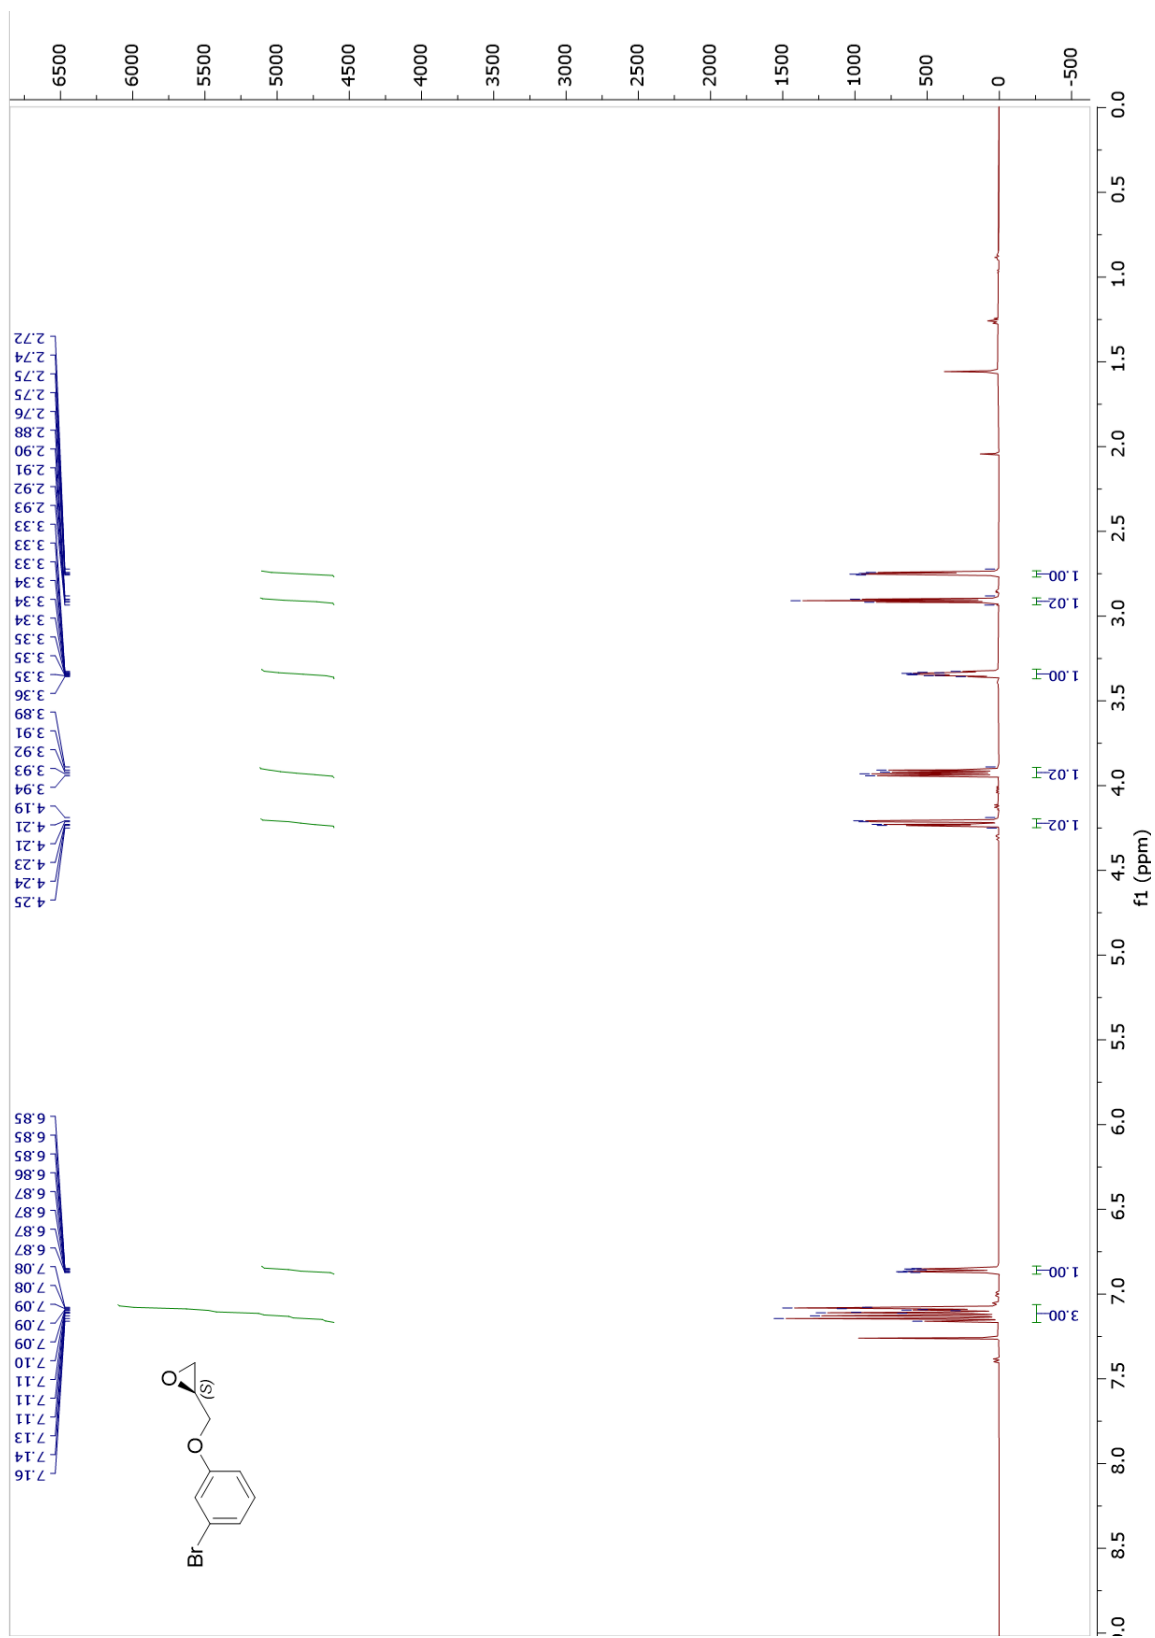

<sup>13</sup>C NMR for (S)-2-((3-bromophenoxy)methyl)oxirane (+)-5

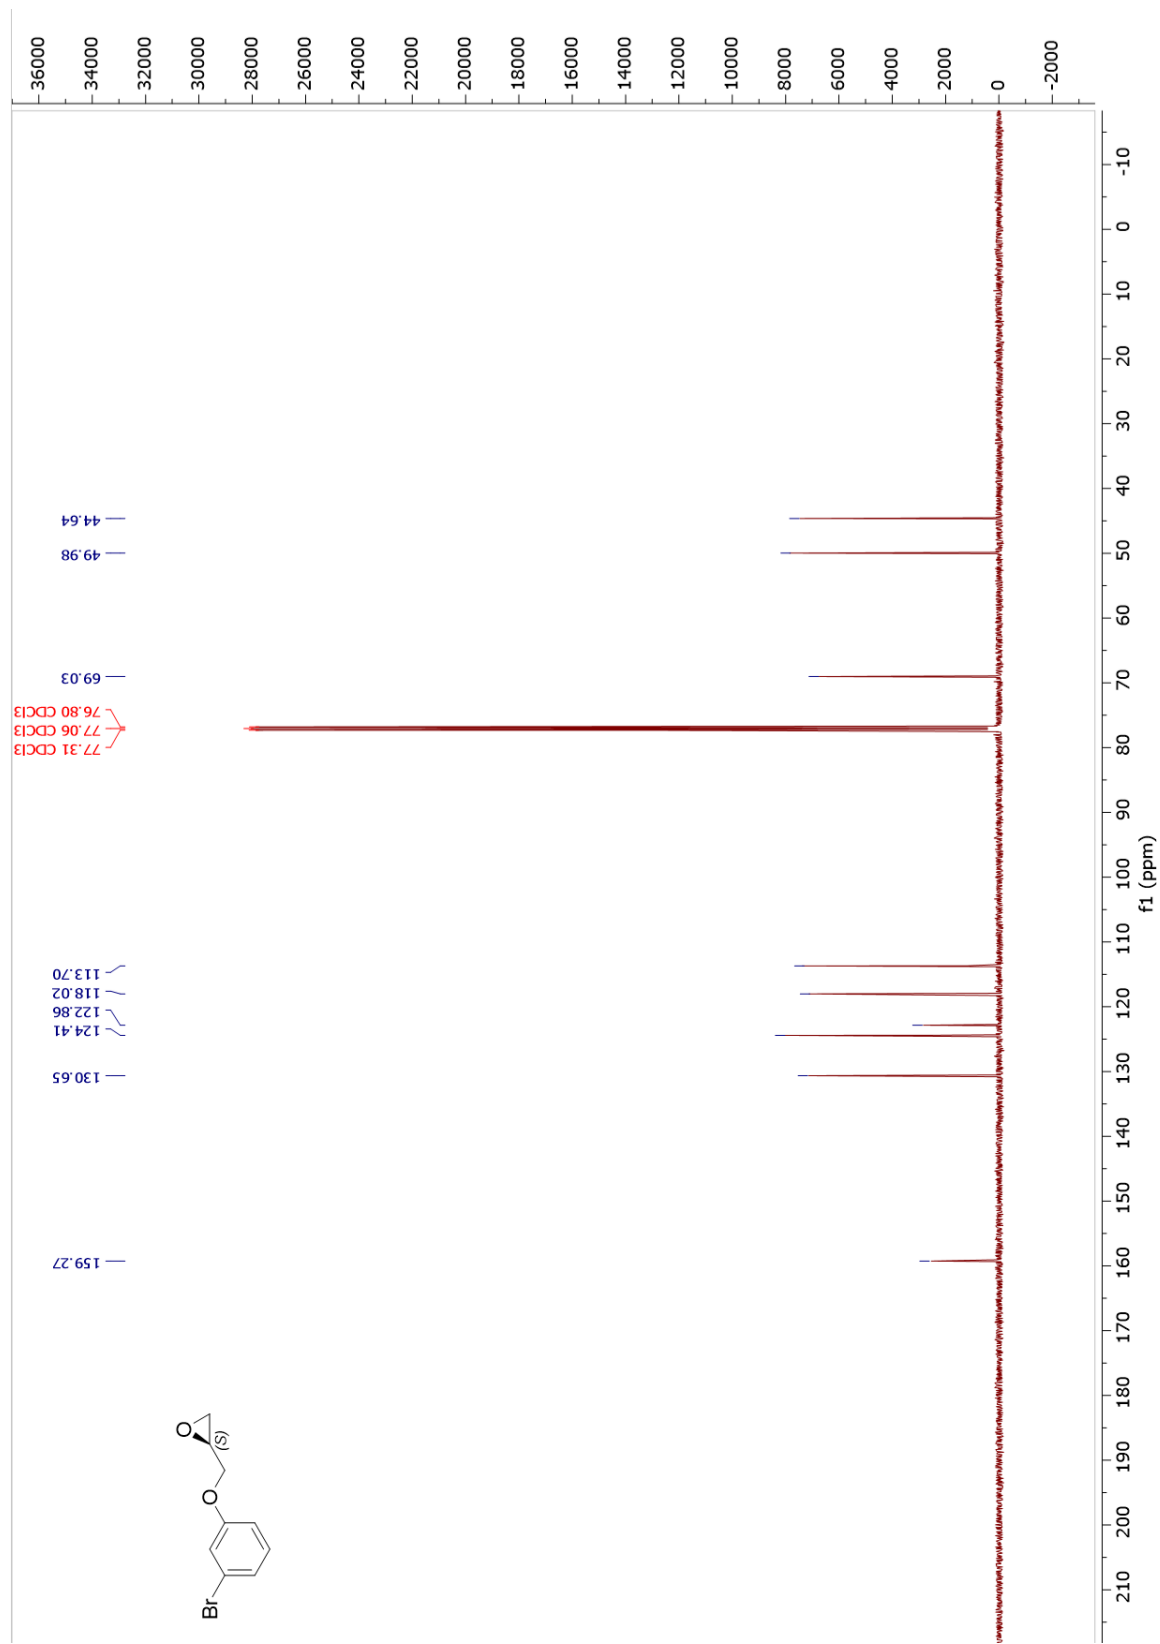

<sup>1</sup>H NMR for 1-(((R)-oxiran-2-yl)methoxy)-3-(((S)-oxiran-2-yl)methoxy)benzene 2RS

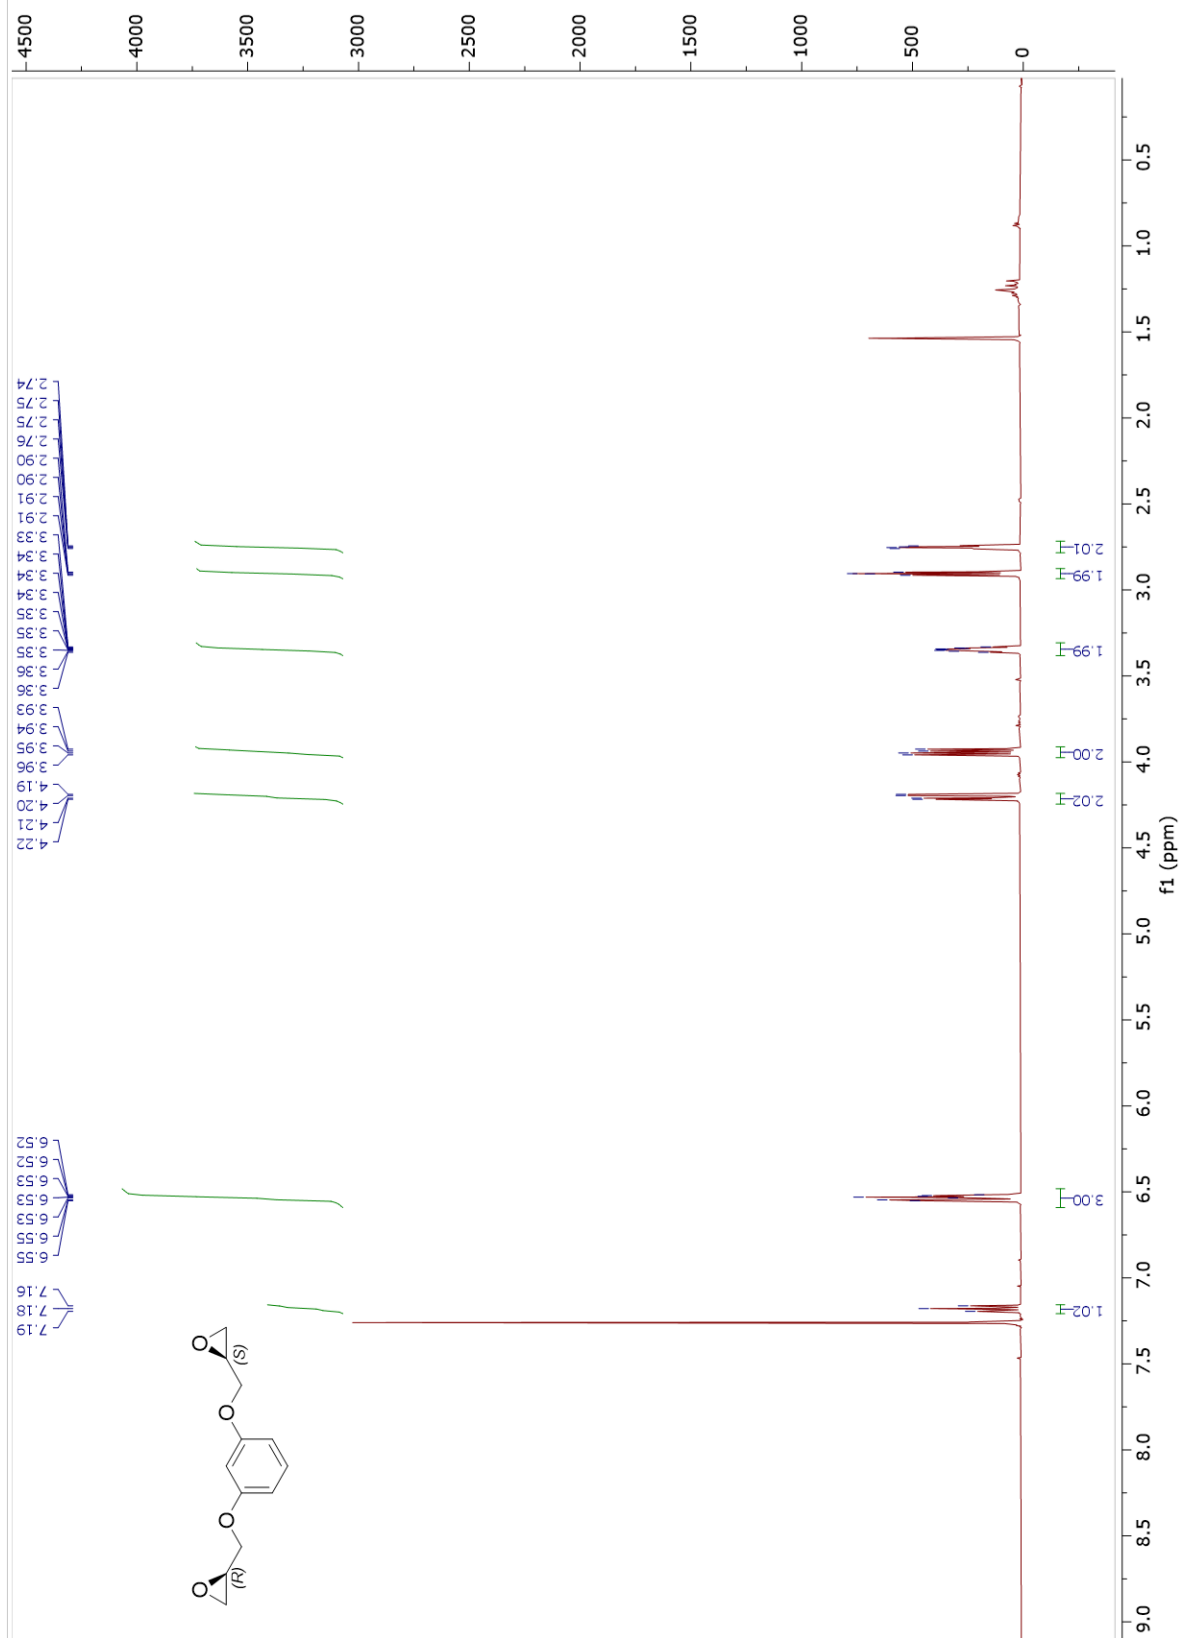

**<sup>13</sup>C NMR for 1-(((R)-oxiran-2-yl)methoxy)-3-(((S)-oxiran-2-yl)methoxy)benzene 2RS**

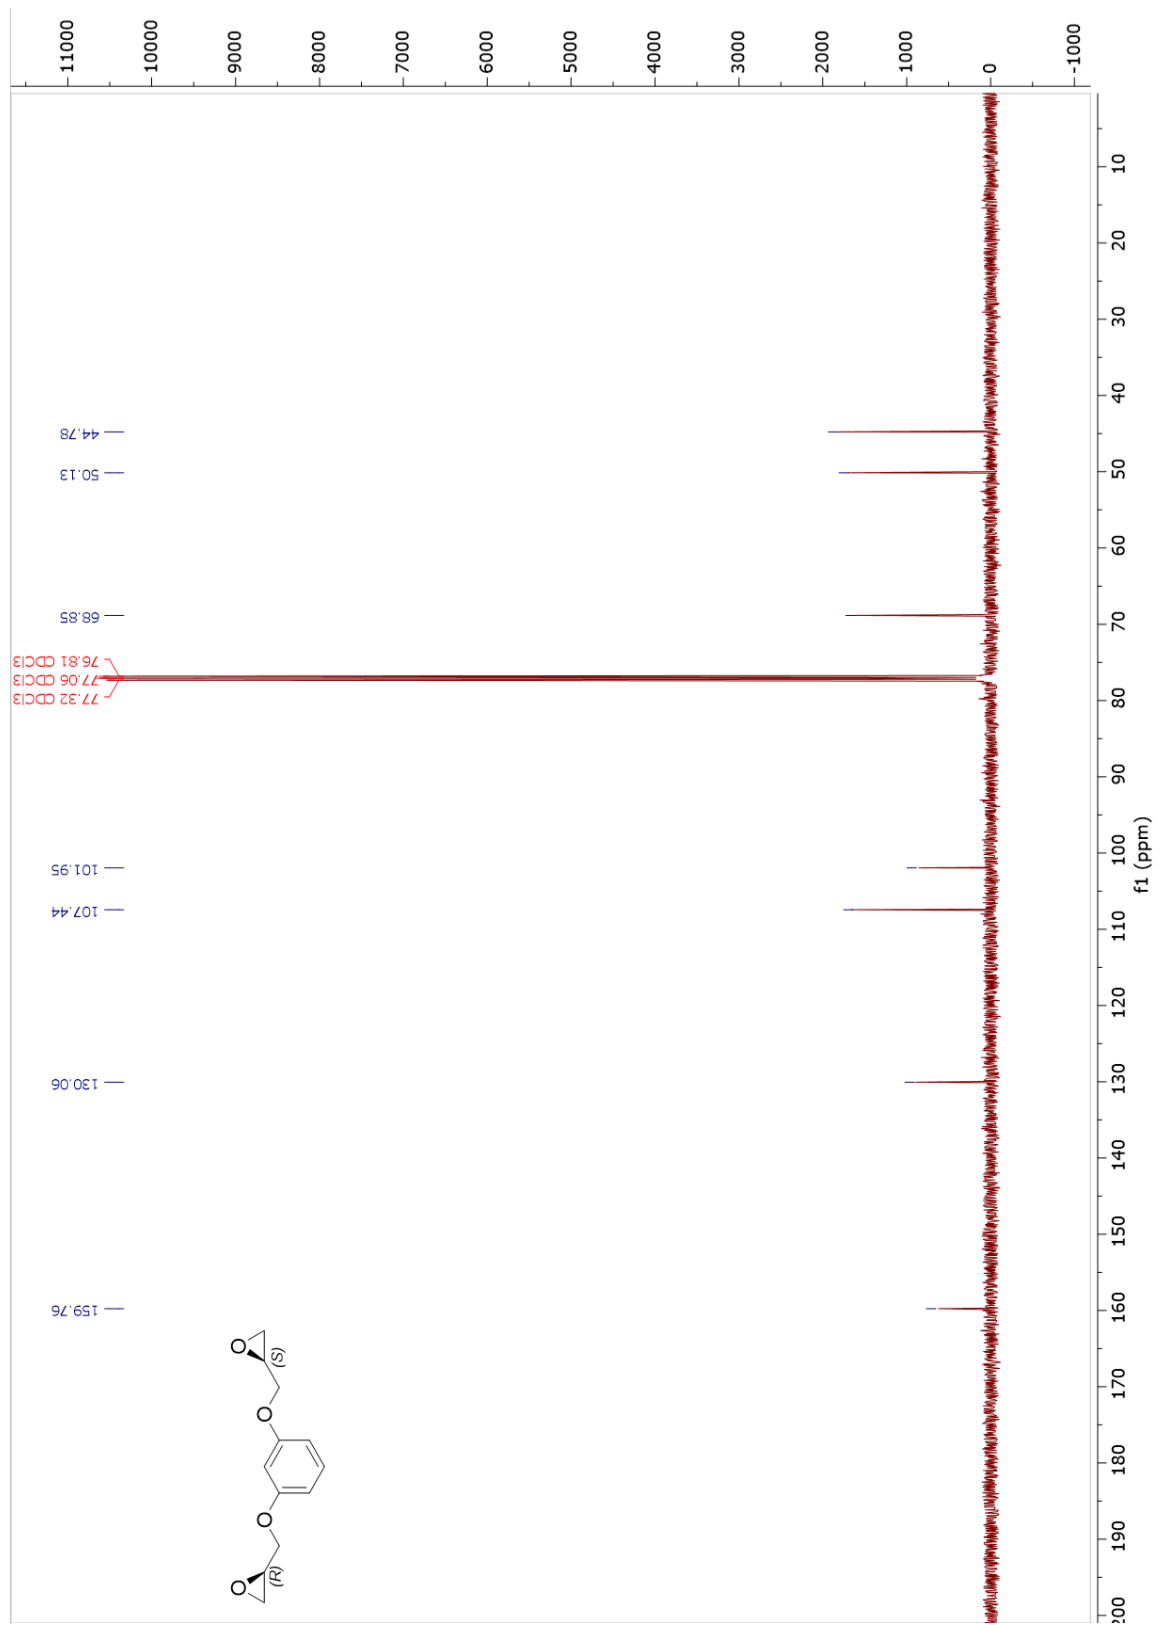

**<sup>1</sup>H NMR for (S)-1-(3-((R)-2-hydroxy-3-(piperidin-1-yl)propoxy)phenoxy)-3-(piperidin-1-yl)propan-2-ol 3RS**

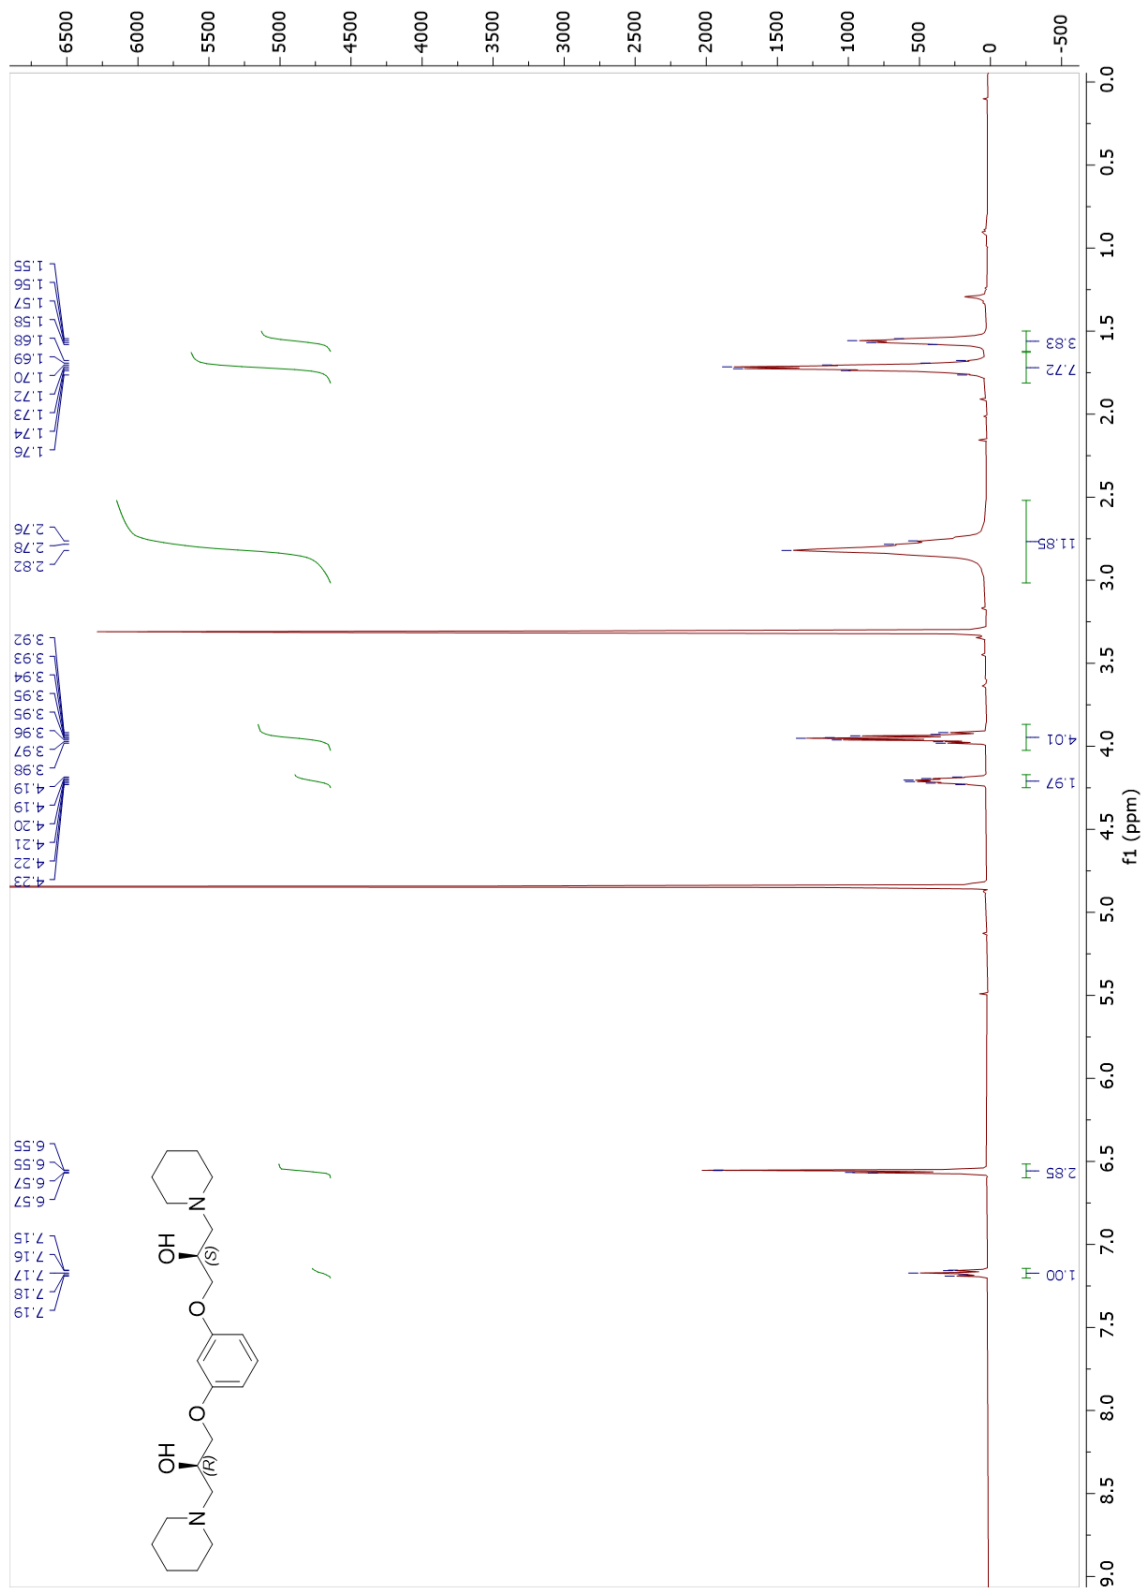

**<sup>13</sup>C NMR for (S)-1-(3-((R)-2-hydroxy-3-(piperidin-1-yl)propoxy)phenoxy)-3-(piperidin-1-yl)propan-2-ol 3RS**

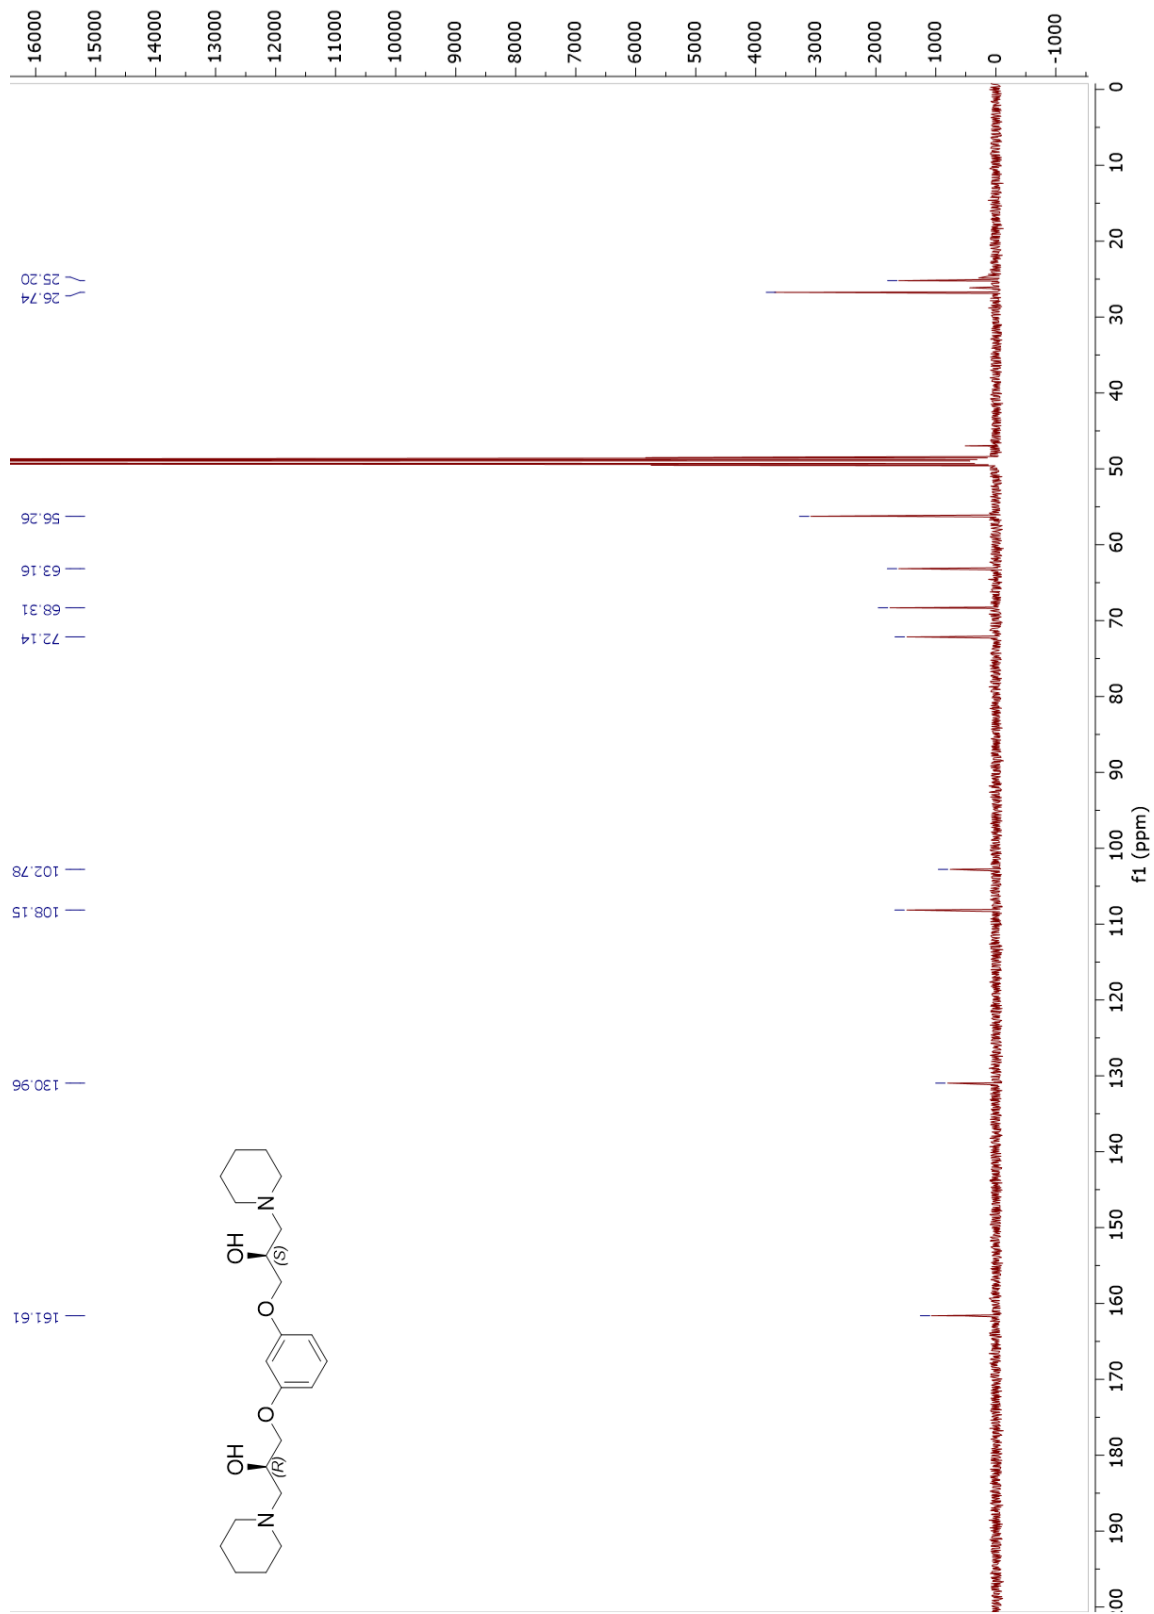

Supplement: mmc1.pdf [file mmc1.pdf]
